26 LAY SUMMARY

27 Neutral theory was predicated on theoretical arguments that adaptation is subject to a speed limit. We  
28 resolve confusions regarding historical speed limit arguments, which depend on differences in fitness, not  
29 variance (differences in fitness squared). We generalize the underlying concepts of selective deaths and  
30 reproductive excess to populations with any life cycle, even those for which an “individual” and hence  
31 generation and fitness, are poorly defined. We apply the revised theory to Arabidopsis data,  
32 demonstrating the potential for future related experiments.

33

34 INTRODUCTION

35 During an adaptive sweep, new alleles need to be substituted for old alleles across an entire population.  
36 This means that all individuals with the old alleles need to leave no descendants, and individuals with  
37 new alleles must produce enough offspring to replenish the population. These requirements put a limit on  
38 the speed at which sweeps can happen, which could be prohibitive if many sweeps need to occur quickly.  
39 Haldane (1957) used this reasoning to propose a rough estimate of the maximum speed at which sweeps  
40 could accumulate. This speed limit, later known as Haldane’s dilemma (Van Valen 1963) motivated the  
41 development of Kimura’s (Kimura 1968) neutral theory. However, the underlying logic has been  
42 challenged on multiple counts (Ewens 1970; Felsenstein 1971; Kern and Hahn 2018; Maynard Smith  
43 1968). In these discussions, conceptually distinct approaches to quantifying the issue are often described  
44 using identical terms, which apart from being confusing, leaves unresolved the critical question: what is  
45 the upper limit on the speed of adaptation, and does it matter for natural populations?

46 Here we first synthesize the historical literature, drawing out several key quantities (see Results). First, a  
47 population has a “reproductive excess”, meaning how many individuals at a given life history stage are in  
48 excess of the minimum number required to avoid a decline in population size over the next life cycle (see  
49 Glossary for definitions of the terms used here). The second key quantity is the “selective deaths”

50 (including foregone fertility) required for selection to effect a change in allele frequency. These can be  
51 quantified as the degree to which the mean individual survives and reproduces worse than the best  
52 genotype present. The “cost of selection” is the number of selective deaths required to achieve a given  
53 adaptation rate. Haldane (1957) assumed, without evidence, that at most 10% of deaths were selective, an  
54 assumption repeated by all subsequent work.

55 Haldane (1957) confused the cost of selection, which is related to differences between the mean  
56 individual and the best genotype present, with the lag load, which compares to an ideal genotype that is  
57 unlikely to exist (Ewens 1970). However, Nei (1971) and Felsenstein (1971) derived a near-identical  
58 speed limit to Haldane’s, without this flaw, by examining the requirement for selective deaths within a  
59 model in which reproductive excess is finite.

60 Explicit consideration of reproductive excess means abandoning relative fitness models, which consider  
61 only one life history stage with adult population size  $N$ , with an implied infinite number of juveniles  
62 (Bertram and Masel 2019). Models of finite reproductive excess need at least two life history stages:  
63 adults and juveniles, where the latter shows reproductive excess relative to the former. Selective deaths  
64 are then relative not to a single adult population size  $N$  as in Haldane’s (1957) model, but to a  
65 denominator describing the population size at the appropriate life history stage (Kimura and Crow 1969).

66 An emphasis on life history transitions rather than generations is a strength rather than a weakness of the  
67 selective deaths view. One of the many flaws of the concept of “fitness” (Van Valen 1989) is the  
68 difficulty of defining a “generation” for many species, especially colonial species for which an  
69 “individual” is not well defined (Wilson and Barker 2021). Consider for example the budding yeast  
70 *Saccharomyces cerevisiae*. Is each mitotic division a generation? Or each life cycle spanning from  
71 meiosis to meiosis, with variable number of mitoses in between? Or the span between outcrossing events,  
72 with variable occurrences of selfing as well as mitoses in between? Or is a generation best defined  
73 ecologically with respect to dispersal between resources that allow growth? Problems defining a  
74 generation arise for a broad range of species (albeit not humans, nor many other animal species), but are

75 resolved when population dynamics are viewed as a series of life history transitions. The “generation”  
76 that matters in this view is not the concept of one complete life cycle, but rather the “generation” of  
77 reproductive excess, in contrast to other life history transitions that involve survival rather than  
78 reproduction.

79 After synthesizing the literature, here we reformulate and generalize Nei’s (1971) and Felsenstein’s  
80 (1971) ideas to selection on both fecundity and survival, to life cycles with selection at more than one  
81 stage, and to life cycles with a variable number of stages. We clarify the concepts of reproductive excess  
82 and selective deaths, and use our general theory to pose two empirically accessible questions. First, how  
83 much reproductive excess does a genotype or population produce, beyond what is needed to avoid  
84 decline? Second, what fraction of deaths are selective (and how does this compare to the 10% guess made  
85 by Haldane)? Posing questions in this form allows us to make the first empirical estimates with which to  
86 ground Haldane’s approach. We use data from Exposito-Alonso et al. (2019), who counted or estimated  
87 every plant grown and seed produced of *A. thaliana* cultivars from 517 different genotypes in one season,  
88 under 8 distinct environmental conditions. These data are not representative of natural conditions, but  
89 they suffice to illustrate how such an analysis can be done. Ours is the first direct application of Haldane’s  
90 selective death arguments to empirical data, representing proof of principle.

## 91 METHODS

### 92 **Environmental conditions**

93 We re-analyze the data of Exposito-Alonso et al. (2019), who used a  $2 \times 2 \times 2$  design for environmental  
94 conditions, with the three treatments being climate, water availability, and adult density (see github for  
95 raw data and analysis code). We treat these as eight separate populations. For climate, plants were grown  
96 in outdoor field stations in either Tübingen, Germany (near the center of the species range of *A. thaliana*)  
97 or in Madrid, Spain (at the southern edge of the range). Plants were all artificially watered. The high-  
98 water treatment matched soil moisture levels near the station in Germany, and the low-water treatment

99 matched soil moisture levels near the station in Spain. To generate high adult density, thirty seeds of the  
100 same genotype were planted per pot. For low density, several seeds (~10) were planted per pot, enough to  
101 ensure that at least one seed would germinate, but few enough that the seeds were unlikely to inhibit each  
102 other pre-germination. To avoid any competition between adult plants in the low density treatment, only  
103 one seedling, chosen at random, was retained after germination, and the rest were plugged out and  
104 discarded. We refer to each treatment with a three-letter abbreviation: M or T for Madrid or Tübingen, L  
105 or H for low or high water, and I or P for a single individual plant or a population of thirty plants per pot.  
106 For example, the treatment with thirty seeds per pot grown in Madrid with high water is abbreviated as  
107 MHP.

108 Within each of the eight populations, seeds from 517 fully homozygous plant genotypes (taken from a  
109 parental generation grown under controlled conditions to control for parental effects) were grown in pots  
110 that included only plants of that genotype. The number of replicate pots per genotype per population was  
111 occasionally as few as one due to experimental losses, but mostly ranged between five to seven replicates.  
112 Our interest is in differences among genotypes, not among replicates. We therefore calculate key  
113 quantities of interest for each genotype-environment combination by averaging across replicates.

#### 114 **Selective deaths**

115 The experiment can be mapped reasonably easily onto theoretical treatments. In each environmental  
116 treatment, a starting population of seeds grows into adult plants, experiencing both selective deaths and  
117 non-selective deaths as they proceed from seeds to seedlings to adults. Plants which survive to become  
118 adults then produce  $k$  seeds on average, some of which would normally constitute the next generation,  
119 although the experiment concludes at the end of season. The experiment does not capture the life history  
120 stage of seed dispersal to fertile ground, to complete the life cycle that began with seeds planted in a pot.  
121 Juvenile deaths must be treated differently for the low- and high-density treatments. In the low-density  
122 treatment, where exactly one seedling is retained after germination, we do not have access to data on

123 selective seed deaths, and so consider only seedling selective deaths. In the high-density treatment, any of  
124 the thirty seeds that fail to survive to the end of the experiment are counted as deaths, whether due to seed  
125 death before germination or to subsequent seedling death; our selective death calculations do not  
126 differentiate between these two life history transitions. This means that across the two life history  
127 transitions at which juvenile plants can die (as planted seeds before germination and as seedlings), only  
128 one set of juvenile deaths is recorded in each density treatment, but they are not comparable. They are  
129 combined seed and seedling deaths in the high-density case, and seedling deaths alone in the low-density  
130 case. Histograms are shown in Supplementary Figures 1-2.

131 In each treatment, we score the observed juvenile death rate of the highest performing genotype as the  
132 baseline extrinsic mortality for all genotypes (i.e. as non-selective deaths). Conceptually (ignoring a  
133 correction for extreme value bias that is treated in the Supplement), for each life history transition in each  
134 environmental condition we have:

135 
$$\text{Selective deaths in the population} = \sum_i n_i(d_i - d_{best})$$

136 where  $n_i$  is the starting population of genotype  $i$  at that life history transition,  $d_i$  is the genotype's average  
137 death rate during that life history transition, and  $d_{best}$  is the average death rate of the genotype with the  
138 lowest death rate for that life history transition in that environment.

### 139 **Test for genetic variance in fecundity**

140 Selective “deaths” can also be defined for unrealized fecundity. We did not analyze this here, because of  
141 lack of evidence for significant genetic differences in fecundity. In support of this, we performed an  
142 ANOVA test on fecundity in each environmental condition. We only have information on fecundity as an  
143 aggregate per replicate pot (rather than per individual plant in the high-density condition), so we compare  
144 among-genotype variance to among-replicate variance. Note, however, that we remove replicates that had  
145 no adults surviving to reproductive maturity, as well as genotypes with only a single replicate pot with

146 surviving adults (and therefore no way of estimating among-replicate variance). All surviving adults  
147 produced at least some seeds. We Box-Cox transformed the data for each pot with surviving adults in  
148 each environmental condition (see Supplementary Figure 3 for post-transform histograms) before  
149 performing the ANOVA.

### 150 **Proportion of juvenile deaths selective**

151 Because *A. thaliana* is an annual plant, all juveniles will die by the end of the season, whether as selective  
152 deaths during the experiment, non-selective deaths during the experiment, or non-selective deaths after  
153 the end of the experiment. From this we obtain, for each environmental condition:

$$154 \quad \text{Fraction of juvenile deaths selective} = \frac{\textit{Selective deaths of juveniles}}{\textit{Starting population}}$$

155 In the high-density populations, the starting population is 30 seeds per pot. In the low-density  
156 populations, the starting population is 1 seedling per pot.

### 157 **Pairwise genotype comparisons**

158 For every possible pair of genotypes, we repeat the analysis above to estimate selective deaths and the  
159 proportion of deaths which are selective, using the better genotype of the pair as the ‘best’ genotype in the  
160 calculation of selective deaths. With only two genotypes, we do not adjust for extreme value bias. Using  
161 whole-genome information, we calculated the total number of SNP differences between each pair  
162 (Hamming distance, number of allele differences out of 1,353,386 biallelic SNPs) using PLINK v1.9.

163

## 164 **RESULTS**

### 165 **Synthetic historical review**

166 Haldane made two somewhat different arguments in his seminal 1957 paper, muddying the waters from  
167 the beginning. In the first argument, he defined “selective deaths” as the subset of deaths  $s(1 - p)N$  that

168 contribute to a change in the allele frequency  $p$ , where  $s$  is the selection coefficient. This was on the basis  
169 that the  $(1 - p)N$  individuals that lack a beneficial mutation experience  $s$  more deaths than they would if  
170 they had the mutation, and those extra deaths are required for selection to have its effects. Note that  
171 reduced fecundity is mathematically equivalent to increased mortality, and selective “deaths” can thus  
172 result from losing potential offspring, not just literal deaths.

173 Haldane defined the “cost of selection” as the number of selective deaths occurring during a substitution  
174 (i.e. a selective sweep from low allele frequency to fixation). He calculated this cost as the integral of  
175  $s(1 - p)N$  over the course of a sweep from allele frequency  $p = p_0$  to close to 1 (Figure 1A). In a  
176 haploid population of constant size  $N$ , one sweep requires  $N \times D$  selective deaths, where  $D =$   
177  $-\ln(p_0) + O(s)$ . For appropriately small  $s$  and  $p_0$  (Haldane suggests  $s < \frac{1}{3}$  and  $p_0 = 10^{-4}$ ), the first term  
178 dominates, making  $D$  nearly independent of the selection coefficient. For alternative assumptions about  
179 ploidy, dominance, and degree of inbreeding,  $D$  is a different function of  $p_0$ , but  $s$  remains unimportant  
180 unless close to 1 (Haldane 1957). In a representative case of  $p_0 = 10^{-4}$  at a diploid autosomal locus with  
181 no dominance,  $D = 18.4$ . Haldane conservatively estimated that  $20\text{-}30N$  selective deaths are likely to be  
182 typical for a sweep.

183 Haldane’s second argument about adaptation rate limitations relied on load calculations. Load is a  
184 reduction of a population’s fitness relative to a reference optimal genotype (Figure 1B). Haldane  
185 considered  $x$  loci independently undergoing sweeps, such that the current allele frequency at the  $i^{\text{th}}$  locus  
186 reduces population fitness by a factor of  $1 - d_i$  relative to its post-sweep value. The fitness of the  
187 population is then lower than that of a hypothetical perfect population by a factor of  $\prod_{i=1}^x (1 - d_i) \approx$   
188  $e^{-\sum_{i=1}^x d_i}$ . Haldane claimed that this load relative to an ideal genotype implies that the fraction of deaths  
189 that are selective is  $\sum d_i$ . This was incorrect; the better reference point is the best genotype actually  
190 present in the population. With  $30N$  selective deaths required to complete each independent selective



191 sweep, and  $N$  deaths available per generation, Haldane obtained an average spacing between fixation  
192 events  $n \geq \frac{30}{\sum d_i}$  generations.

193 Haldane's fitness reduction relative to an ideal genotype was later named lag load (Maynard Smith 1976),  
194 inspired by lagging adaptation to a changing environment, where new mutations are required to keep up  
195 (Bertram, Gomez, and Masel 2017). (This is distinct from "evolutionary rescue" (Bell 2017) from  
196 imminent population decline, without asking whether a similar disastrous scenario will promptly recur.)  
197 Lag load can be defined even in a static environment, where innovative new adaptive alleles reveal the  
198 possibility of an even better optimal genotype. The size of a lag load is not important *per se*; what matters  
199 is that it is stable rather than growing. While speed limits do not threaten the persistence of a species  
200 adapting in a constant environment, real species do face rapidly changing environments (biotic and  
201 abiotic) that can threaten population persistence. I.e., for population persistence, the speed of adaptation  
202 must keep up with the speed of environmental change.

203 Haldane argued *a priori* that species could probably only sustain about 10% selective deaths (which he  
204 incorrectly equated with 10% lag load) for any serious length of time. From this assumption, he derived a  
205 speed limit of around one sweep every 300 generations, later called "Haldane's dilemma" (Van Valen  
206 1963). All subsequent authors have continued to assume a 10% figure.

207 The fact that there are so many amino acid substitutions, each requiring a sweep, was the original  
208 evidence supporting neutral theory (Kimura 1968). Kimura and Ohta (1971) plugged in estimates of the  
209 actual rate of substitution in mammalian lineages as  $n$  in Haldane's equation  $L = e^{-30/n}$ , which produced  
210 what they considered to be an excessively large lag load. Although still a lag load argument, their  
211 argument was subtly different from Haldane's, arguing that a high lag load implies that typical individuals  
212 would need to have a biologically implausible fraction of their offspring die (Kimura and Ohta 1971).

213 Ewens (1970) pointed out that Haldane's and Kimura's load arguments improperly use the lag load  
214 (comparison to an ideal genotype) to calculate selective deaths, where they should have mean fitness

215 relative to the most fit individual present. In a population with many sweeps occurring at once, the  
216 likelihood that even a single individual has the ideal combination of alleles is vanishingly small (Figure  
217 1B). More recent travelling wave theories have rediscovered the importance of this relative type of load,  
218 and named it the “lead” (Desai and Fisher 2007).

219 Prior to modern travelling wave theory, approximations for the lead were derived from variance in fitness  
220 (Ewens 1970; Kimura 1969). In the case of many independent sweeps at once, variance in fitness (after  
221 normalizing mean population fitness as 1) is approximately  $s/n$ , where  $s$  is the selection coefficient of an  
222 adaptive allele and  $n$  is the number of generations between fixation events (Ewens 1970). The fittest  
223 genotype likely to be present can be estimated using the statistics of extreme values. E.g., for a population  
224 of size  $10^6$ , the most extreme fitness value likely to appear is around 4.9 standard deviations above the  
225 mean (Ewens 1970). Using Haldane’s 10% as an estimate of the lead (instead of the lag load) yields  
226  $4.9\sqrt{s/n} = 0.1$ . For  $s = 0.01$ ,  $n$  is around 20, much less than Haldane’s estimate of 300, and  $n$  is lower  
227 still for lower  $s$ . In other words, Ewens (1970) found that many simultaneous sweeps do not imply an  
228 implausibly large lead, and the corresponding speed limit of  $n \approx 20$  is not an obstruction with respect to  
229 observed rates of amino acid divergence. Similar arguments have been applied to deleterious mutation  
230 load (Galeota-Sprung, Sniegowski, and Ewens 2020).

231 Although Ewens’ argument revolved around lead, which is a difference between fitnesses, his approach  
232 continued the traditional emphasis of evolutionary genetics on variance in fitness, which describes the  
233 mean square of differences (Crow 1958; Ewens 2004; Fisher 1930). Modern traveling wave theory  
234 instead derives the lead directly from  $s$ ,  $N$ , and the beneficial mutation rate  $U$ , and obtains the variance in  
235 fitness variance only downstream from that (Desai and Fisher 2007), rather than relying on our ability to  
236 directly measure fitness and its variance as an input to the calculation.

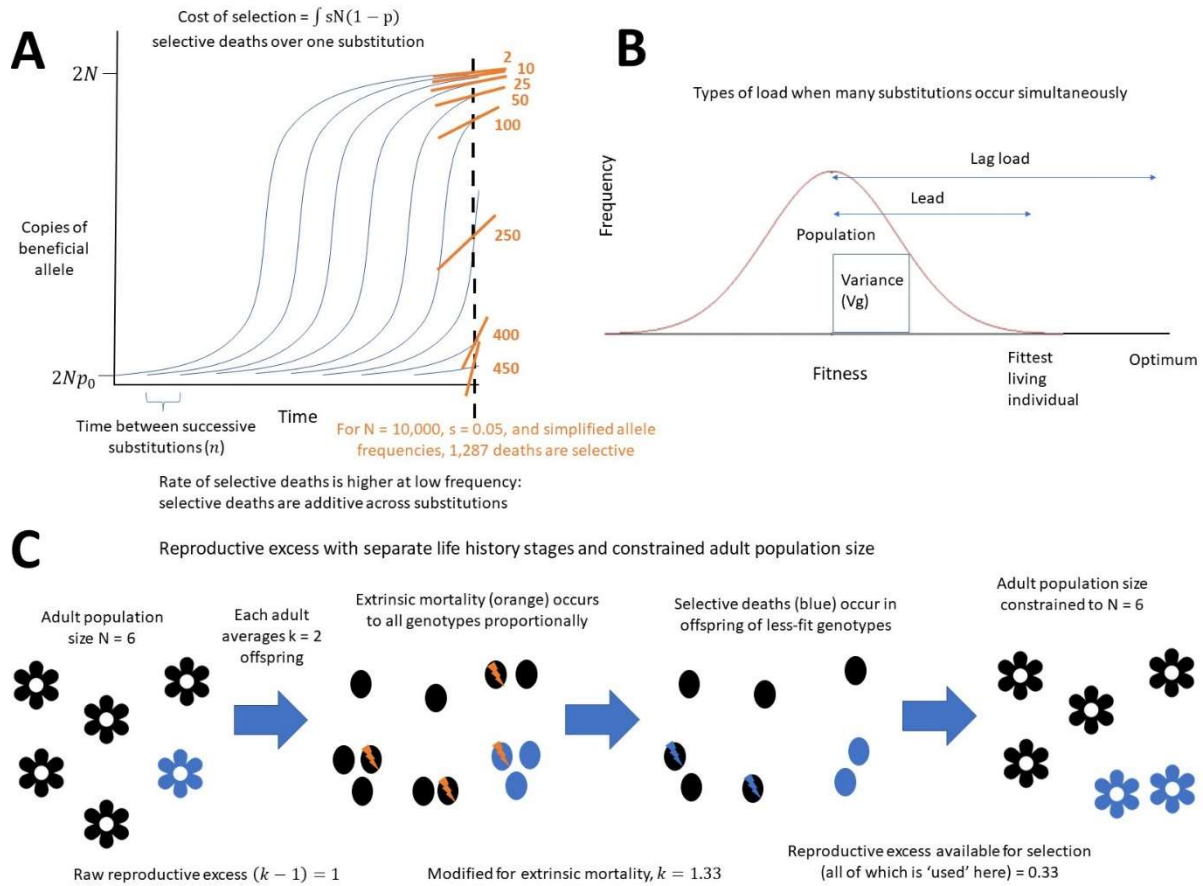

237

238 **Figure 1.** Three different types of arguments have been used to argue for limits to the speed of adaptation.

239 A) The cost of selection is the number of selective deaths that must occur over time to complete a single

240 sweep (each sweep shown as a logistic curve). The cost of selection at one timepoint is the sum of the

241 costs for each current sweep, illustrated as the slopes of the orange lines, each calculated as the subset of

242 deaths  $s(1-p)N$  that contribute to a change in the allele frequency  $p$ . B) Load arguments calculate the

243 reduction in mean fitness of a population from what it could be. C) Finite reproductive excess imposes an

244 upper limit on how many selective deaths per generation a population can sustain, which sets an upper

245 bound to how fast substitutions can occur.

246

247 Maynard Smith (1976) made a quite different argument against speed limits, claiming that the reason  
248 Haldane’s dilemma is not a problem is pervasive synergistic epistasis. Synergistic epistasis increases  
249 differences in fitness above those expected from differences in the numbers of beneficial mutations,  
250 thereby making each selective death more likely to count towards a larger number of sweeps at once. A  
251 persistent source of confusion has been that in his model of truncation selection, Maynard Smith also  
252 made the shift from Haldane’s absolute fitness to a more standard population genetic relative fitness, and  
253 hence from lag load to lead. The fact that Haldane’s dilemma did not arise in Maynard Smith’s model  
254 might therefore be due to reasons put forth by Ewens, rather than due to epistasis.

255 Although Ewens’ lead-based approach negates arguments that convert lag load into a speed limit (i.e.  
256 Haldane’s second argument), it doesn’t address Haldane’s first line of argument: the cost of natural  
257 selection in terms of selective deaths. Confusion between these two disparate lines of argument was  
258 exacerbated by the fact that different papers use the term “substitutional load”, which we avoid here, to  
259 mean very different things. ‘Substitutional load’ has been used to refer to what we here call the lag load  
260 (Kimura and Ohta 1971), the cost of selection (Kimura 1968), the lead (Maynard Smith 1976), the  
261 number of offspring that the most fit genotype must produce (Ewens 2004), the sum of lag load across all  
262 generations involved in a substitution (Kimura 1960; Nei 1971), and even more broadly to refer to  
263 variance rather than load-based arguments when made in the context of similar questions (Ewens 1970).  
264 This confusion in terminology has obscured the consequences of formulating Haldane’s dilemma in  
265 different ways.

266 Nei (1971) and Felsenstein (1971) made a key advance that was perhaps not fully appreciated amidst the  
267 confusion. The relative fitness models which dominate population genetics (e.g. Wright-Fisher and  
268 Moran) implicitly assume inexhaustible reproductive excess (Bertram and Masel 2019). This can be seen  
269 easily in simulations using a rejection sampling method – when fitness is low, an absurd number of  
270 zygotes might be generated and discarded prior to filling the  $N$  slots. However, real populations have a  
271 finite reproductive excess, e.g. human females do not easily have more than 20 infants. This constrains

272 members of the next generation to come from the options contained within that finite set of potential  
273 offspring. This concept has been applied to lethal mutagenesis strategies for anti-viral drugs (Bull,  
274 Sanjuán, and Wilke 2007).

275 Nei (1971) and Felsenstein (1971) each modelled independently evolving sites in a haploid population  
276 with adult population size  $N$ . Each adult has fecundity  $k$ , i.e. produces  $k$  offspring prior to juvenile deaths  
277 (Figure 1C, first arrow). In their deterministic models,  $k$  is exact, but the theory readily generalizes to  
278 interpreting  $k$  as an expectation. The raw reproductive excess is thus  $(k - 1)N$ , with  $k > 1$ . Some  
279 reproductive excess is lost to non-selective mortality, set not by an extrinsic rate, but derived from  
280 population size regulation after selective mortality (Figure 1C, far right). Extrinsic mortality occurring  
281 prior to selective mortality, and hence at a fixed rate, can be folded into a lower value of  $k$ . While the  
282 number of selective deaths available for adaptation is then still denoted  $(k - 1)N$ , this no longer  
283 represents raw reproductive excess (Figure 1C, second arrow). Haldane's estimate of  $k = 1.1$  (resulting in  
284 a maximum of 10% selective deaths), which Nei (1971) and Felsenstein (1971) retain, includes the fact  
285 that extrinsic mortality substantially reduces the fecundity available to be 'used' for selective deaths.

286 The population then undergoes sweeps, all with the same initial frequency  $p_0$  and selection coefficient  $s$   
287 applying to survival rather than fecundity. Each sweep follows the same trajectory with a mean delay of  $n$   
288 generations between sweeps (Figure 1A). Given independent sites, the cost of selection is summed across  
289 loci at any given point in time (e.g. slopes of orange lines in Figure 1A); Haldane's integral is a method of  
290 calculating the expectation of this sum. Comparing this cost to the reproductive excess of the population  
291 produced the novel result that the minimum spacing  $n$  is  $-\ln(p_0) / \ln(k)$  (Felsenstein 1971; Nei 1971).

292 For Haldane's estimates of  $p_0 = 10^{-4}$  and  $k = 1.1$ , this yields  $n = 97$  generations between selective  
293 sweeps. This can be compared to Haldane's original spacing of  $-\ln(p_0) / \ln\left(\frac{W_{max}}{\bar{W}}\right) = 92$  for a  
294 denominator (somewhat oddly described by Haldane as a selection intensity)  $= \ln\left(\frac{W_{max}}{\bar{W}}\right) = 0.1$ .

295 This new limit based on the finite nature of reproductive excess is much slower than the speeds predicted  
296 by lead-based arguments, but is similar in magnitude to Haldane's original result. Importantly, this speed  
297 limit calculation is not subject to the same criticisms as Haldane's original argument. Where Haldane  
298 compared the mean fitness of the population to the mean fitness of a hypothetical population, Nei's  
299 (1971) and Felsenstein's (1971) approach compares the available reproductive excess to the reproductive  
300 excess required to effect changes in allele frequencies. Even if no individual exists who possesses the  
301 beneficial allele at every segregating site, each sweep still requires a certain fraction of deaths to  
302 contribute to its selection. It is the finite nature of reproductive excess that directly produces this limit on  
303 the rate of adaptation.

304 Felsenstein's (1971) and Nei's (1971) formulations of Haldane's dilemma define the amount of  
305 reproductive excess that is available for selective deaths as  $(k - 1)N$  after controlling for extrinsic  
306 mortality, where  $N$  is the population size prior to the generation of reproductive excess. But the value of  $k$   
307 is an effective value that can conceal much, the “-1” assumes that perfect density regulation demands no  
308 excess individuals above  $N$ , and the  $N$  refers always to the same adult life history stage. This “effective”  
309 reproductive excess parameter is better conceived of as a measure of the proportion of deaths that are  
310 selective than as a true reproductive excess, and indeed they used Haldane's estimate for 10% deaths  
311 being selective to set  $k = 1.1$ . Just because a species like *A. thaliana* has high fecundity (high raw  
312 reproductive excess), this tells us nothing about the proportion of deaths that are selective.

### 313 **Theory**

314 Previous theoretical treatments by Nei (1971) and Felsenstein (1971) assume that all genotypes have the  
315 same fecundity ( $k$ ), i.e. that there is no selection on fecundity, only on the single life history transition  
316 representing survival. They also assume that extrinsic mortality has a density-dependent component such  
317 that the combination of selective and non-selective mortality is perfectly balanced with fecundity. These  
318 are obviously not realistic assumptions. Next, we extend the theory in a variety of ways.

319 *Selective deaths during generative life history transitions*

320 Previous theoretical treatments by Nei (1971) and Felsenstein (1971) emphasize literal deaths. We can  
321 also describe differences in fecundity as selective ‘deaths’. This is because mathematically, foregone  
322 fecundity is equivalent to deaths that take place immediately after fecundity, and can be treated as:

323 
$$\text{Selective 'deaths' during differential fecundity} = N_i(b_{best} - b_i)$$

324 where  $N_i$  is the number of reproductive mature adults,  $b_i$  is the fecundity of genotype  $i$ , and  $b_{best}$  is the  
325 fecundity of the genotype with the highest fecundity in that environment.

326 *Reproductive excess within a fixed life cycle*

327 Next we generalize from just one life history transition experiencing selection, to multiple that occur in a  
328 consistent order. We consider a life history transition  $j$  that starts with population size  $N_j$  and ends at  
329 population size  $N_{j+1} = k_j N_j$ : We now define

330 
$$\text{Reproductive excess after transition } j = k_j N_j - N_{min,j+1}$$

331 where  $N_{min,j+1}$  is the minimum population size at the end of transition  $j$  that is required in order for the  
332 population to achieve size of  $N_j$  at the beginning of transition  $j$  in the next life history cycle. Note that  
333  $k_j > 1$  indicates fecundity while  $k_j \leq 1$  indicates survival.

334 To produce selective deaths,  $k_{i,j}$  must depend on genotype  $i$ . To capture density regulation,  $k_{i,j}$  for at  
335 least some values of  $j$  must depend on population size  $N_j$ . The values  $k_{i,j}$  can also be functions of the  
336 genotype frequencies and/or an absolute measure of time. Two life history transitions (survival and  
337 fecundity) is the minimum, but each of these can be broken up into multiple transitions. For example,  
338 survival ( $k < 1$ ) can be broken into components representing survival at different ages, or a selective  
339 component depending only on genotype vs. a density-dependent extrinsic mortality component depending  
340 only on  $N_j$  vs. an extrinsic mortality component occurring at a constant rate.

341 Reproductive excess can be calculated either with respect to the best genotype present (i.e. the one most  
342 likely to become fixed), or with respect to the population mean, by using different values of  $k_j$  and  
343  $N_{min,j+1}$ . Reproductive excess with respect to the population mean is needed to avoid population decline  
344 in the next generation, while reproductive excess with respect to the best genotype describes the ability to  
345 avoid population decline that would continue even after the best genotype has swept to fixation. The best  
346 choice depends on the particulars of the population in question. For example, studying balancing selection  
347 calls for the population mean, while studying evolutionary rescue calls for the best genotype.

348 To calculate reproductive excess with respect to the population mean, we solve for  $N_{min,j+1}$  in:

$$349 \quad N_j = N_{min,j+1} \sum_i f_i \prod_{x \neq j} k_{i,x},$$

350 where  $f_i$  is the frequency of genotype  $i$  at the beginning of the transition. With respect to the best  
351 genotype, we instead solve for  $N_{min,j+1}$  in:

$$352 \quad N_j = N_{min,j+1} \prod_{x \neq j} k_{best,x}.$$

353 *Nei and Felsenstein as a special case*

354 Nei (1971) and Felsenstein (1971) treated reproductive excess in the conceptually simple case of only two  
355 alternating life history transitions: births and deaths. Deaths included *only* selective deaths, while the  
356 “effective” fecundity transition was non-selective. They handled non-selective deaths by collapsing them  
357 into the value of  $k_{fecundity\_effective}$ , either before selection on survival (in which case non-selective  
358 deaths reduce  $k_{fecundity\_effective}$  in the current generation), or after selection on survival (in such a way  
359 as to exactly balance out any available deaths that were “unused” by selection in the current generation,  
360 by reducing  $k_{fecundity\_effective}$  in the subsequent generation). The product  $k_{fecundity\_effective} \times$   
361  $k_{selective\_mortality}$  was thus constrained to not exceed 1, via a fudge factor in the former. They solved for  
362 equality to 1 in order to calculate the maximum amount of selective deaths. When this equality is



363 satisfied,  $k_{fecundity\_effective}$  can be interpreted as the product of actual fecundity and non-selective  
364 survival. Fig. 1C interprets this scheme in a temporal manner, proceeding first through non-selective  
365 fecundity to produce raw reproductive excess, then the non-density-dependent component of extrinsic  
366 mortality, then selective deaths, and finally density-dependent extrinsic mortality to cap the population  
367 size at  $N$  adults. They score reproductive excess as subject to the first but not the second form of reduction  
368 down to “effective” fecundity, minus the  $N$  individuals needed to replace the population.

### 369 *Reproductive excess beyond a fixed life cycle*

370 Not all organisms proceed through the exact same sequence of life history transitions every time, e.g. with  
371 budding yeast experiencing a variable number of mitoses in between each meiosis, and a variable number  
372 of selfing events between each outcrossing. In this case we cannot take the product of an exact series of  
373 transitions. Instead, we privilege the life history transition that produces the most severe bottleneck,  
374 assuming that the population will spring back to vibrancy after. We define a minimum number of  
375 individuals  $N_{bot}$  who need to make it through to the other side of the bottleneck, and define

376 Reproductive excess at transition  $j = k_j N_j - \text{min. needed to ensure } N_{bot}$  after bottleneck

377 We now need to take the expectation over all possible series of life history transitions, and solve for  
378  $N_{min,j+1}$  in

$$379 \quad N_{bot} = E \left( N_{min,j+1} \prod_x^{life\ histo\ stages\ between\ j\ and\ bot} k_{best,x} \right).$$

380 The precise value of  $N_{bot}$  will be informed by the ecology of the species in question. It may be small,  
381 such as when just a modest number of new hosts, each colonized by just one infectious microorganism, is  
382 sufficient to ensure the population’s future. The appropriate value of  $N_{bot}$  is the smallest population size  
383 that reliably escapes extinction.

384 *Comparison to fitness*

385 Values of  $k$  in our framework are equivalent to fitness components, with respect to absolute rather than  
386 relative fitness. Haldane obtained selective deaths from  $sN(1 - p)$  over a time step of a complete  
387 generation, where  $s$  is the selection coefficient with respect to relative fitness. We have shown how  
388 selective deaths can be derived directly from the underlying population dynamic model, without requiring  
389 either generation or relative fitness to be defined first.

390 Antagonistic pleiotropy is treated quite differently in a selective deaths framework than for fitness  
391 components. Per-generation fitness is the product of fitness components, such that when a genotype that  
392 benefits fitness in one life history transition bears an antagonistically pleiotropic cost at another, the costs  
393 and benefits at least partially cancel out. In contrast, selective deaths accrue across life history transitions  
394 – each selective death absorbs reproductive excess, and there is no reason for them to cancel out.  
395 Similarly, there is no cancelling out across generations, e.g. seasonally fluctuating selection must incur  
396 many selective deaths in order to effect the large allele frequency fluctuations that have been observed  
397 around the long-term mean (Kelly 2022; Machado et al. 2021; Rudman et al. 2022). This high demand for  
398 selective deaths also applies, given life history trade-offs, to unobserved effects that more quickly cancel  
399 out between successive life history transitions.

400 In the simple case of just births at rate  $b$  and deaths at rate  $d$ , classic population genetic per-generation  
401 fitness corresponds to the effective reproduction number  $b/d$ , while the Malthusian parameter gives an  
402 alternative formulation of fitness as  $b - d$ . A Malthusian approach is generally preferred when dealing  
403 with complications of age- or stage-structured populations. Our approach extends an effective  
404 reproduction number framing to these more complex scenarios, while avoiding dependence on the  
405 definition of one “generation”. While the Malthusian approach is sufficient for many purposes, something  
406 closer to an effective reproduction number approach is required to capture the finite nature of  
407 reproductive excess and the corresponding limits to selective deaths and hence adaptation. We note that

408 often the question being asked is simply what will invade, in which case either approach can be used  
409 (Lehmann et al. 2016; Metz, Geritz, and Nisbet 1992; Roff 2008).

#### 410 *Comparison to travelling wave models*

411 It is instructive to calculate the required reproductive excess and the proportion of deaths selective in the  
412 asexual relative fitness model treated by Desai and Fisher (2007), whose Eq. 39 solves for the lead  $qs$  as a  
413 function of  $s$ ,  $U$ , and  $N$ . They define the lead  $qs$  in Malthusian fitness terms, but we approximate it here  
414 in terms of per-generation fitness. With an approximately constant population size, the mean genotype has  
415 absolute fitness  $\sim 1$ , and the best genotype present (the nose) has absolute fitness  $\sim 1 + qs$ . The lead  $qs$   
416 can thus be conceived of as the minimum reproductive excess, with respect to the optimal genotype, that  
417 is required in order to avoid limits to adaptation. This aligns closely with the parameter  $k - 1$  of Nei  
418 (1971) and Felsenstein (1971). The actual reproductive excess in Desai and Fisher's (2007) model is  
419 infinite, as for all models that assume a constant population size and treat only relative fitness.

420 We next calculate the proportion of deaths that are selective. The entire reproductive excess of the best  
421 genotype present,  $RE \geq 1 + qs$ , represents non-selective deaths (or foregone fecundity) among its  
422 offspring. Other genotypes all experience the same rate of non-selective deaths. The per-capita odds that  
423 the next death hits a specific average individual rather than a specific nose individual are  $1:1/(1 + qs)$ .  
424 An average parent therefore expects  $RE(1 + qs)$  offspring deaths during the time in which it expects the  
425  $RE$  non-selective offspring deaths that represent a generation, making the proportion of deaths that are  
426 selective equal to  $1 - 1/(1 + qs)$ .

427 For a substantial range of parameters, especially with rapid adaptation with large  $s$ ,  $U$ , and  $N$ , both the  
428 minimum required reproductive excess, and the proportion of juvenile deaths that are selective, exceed  
429 the previously assumed value of 0.1 (Figure 2). This application to the model of Desai and Fisher (2007)  
430 helps clarify the distinction between these two related properties, which were confounded into a single  
431 value of  $k$  by Nei (1971) and Felsenstein (1971). In this particular model, with its explicit adults and

432 implicit juveniles under selection, they are both functions of the lead  $qs$ , but this need not continue to be  
 433 so simple when more complex life histories are considered.

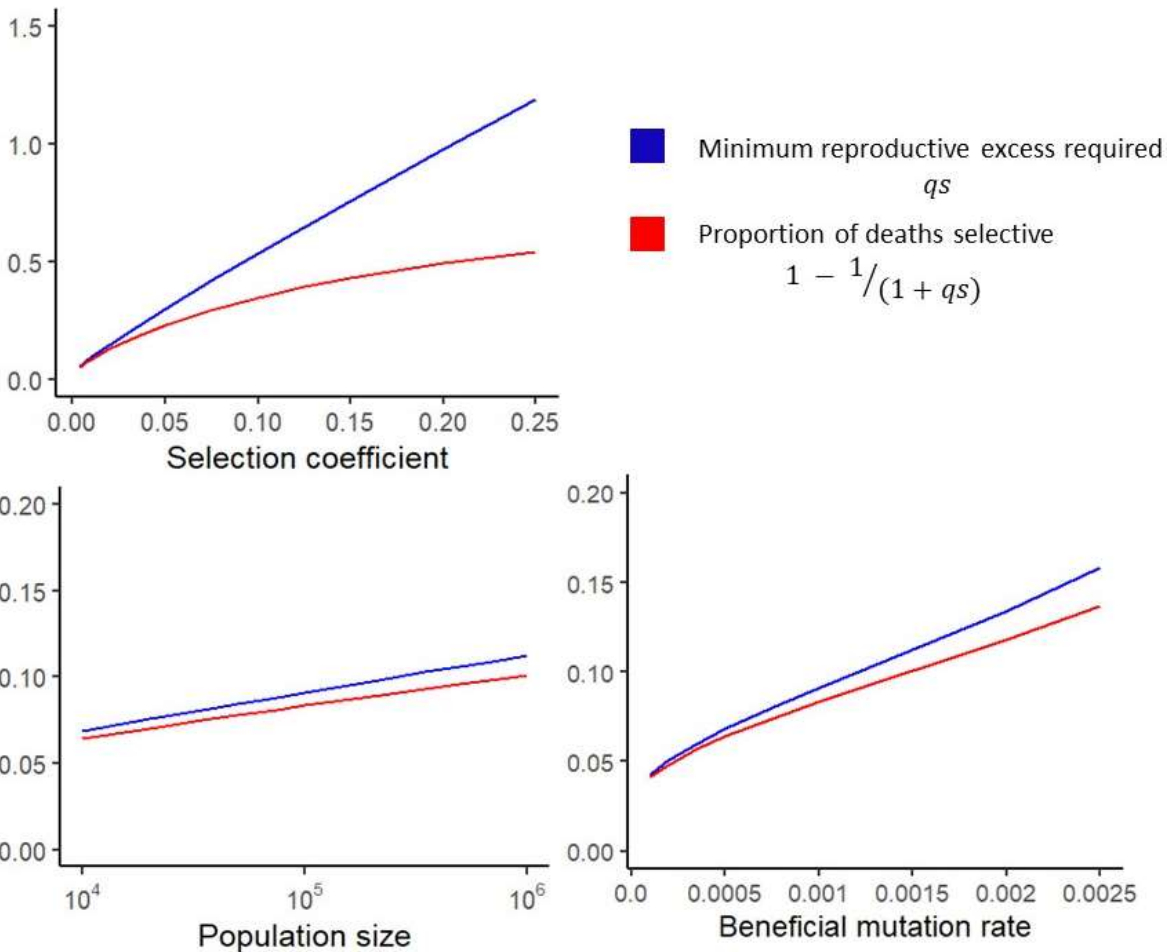

434  
 435 **Figure 2.** As the adaptation rate goes up with increasing  $U$ ,  $s$ , and  $N$ , following the multiple mutations  
 436 regime of Desai and Fisher (2007), so do the proportion of deaths selective and the minimum  
 437 reproductive excess required to sustain that rate of adaptation. Parameter ranges are truncated to avoid the  
 438 regime  $\frac{s}{U} < 3$ , for which the assumptions of the Desai and Fisher's (2007) model break down. The  
 439 minimum required reproductive excess  $qs$  and the corresponding proportion of selective deaths  $1 -$   
 440  $1/(1 + qs)$  were calculated by numerically solving Equation 39 for  $q$  in Desai and Fisher (2007).  
 441

442 *Application of theory to Arabidopsis data*

443 The experiment analyzed here has a fixed life cycle of four life history transitions (adults producing  
 444 seeds, seeds successfully dispersing to suitable habitat, seeds surviving to be seedlings, seedlings  
 445 surviving to be adults). Matching this, we define reproductive excess (*RE*) four different ways, as  
 446 illustrated in Figure 3. Given the presence of many poorly adapted genotypes in the experiment, we  
 447 perform each calculation with respect to the best genotype (denoted by the prime symbol '), yielding:

448 
$$\text{RE}(\text{seed survival}) = k'_{\text{seed\_survival}} N_{\text{seeds}} - \frac{N_{\text{seeds}}}{k'_{\text{seedling\_survival}} k'_{\text{fecundity}} k'_{\text{dispersal}}}$$

449 
$$\text{RE}(\text{seedling survival}) = k'_{\text{seedling\_survival}} N_{\text{seedlings}} - \frac{N_{\text{seedlings}}}{k'_{\text{fecundity}} k'_{\text{dispersal}} k'_{\text{seed\_survival}}}$$

450 
$$\text{RE}(\text{fecundity}) = k'_{\text{fecundity}} N_{\text{adults}} - \frac{N_{\text{adults}}}{k'_{\text{dispersal}} k'_{\text{seed\_survival}} k'_{\text{seedling\_survival}}}$$

451 
$$\text{RE}(\text{dispersal}) = k'_{\text{dispersal}} N_{\text{seeds\_produced}} - \frac{N_{\text{seeds\_produced}}}{k'_{\text{seed\_survival}} k'_{\text{seedling\_survival}} k'_{\text{fecundity}}}$$

452

453 In the high density environmental conditions, we use a single survival transition to cover both seeds and  
 454 seedlings. Under low density conditions, where one seedling was chosen at random from the product of  
 455 10 planted seeds, we use  $k_{\text{seed\_survival}} = 0.1$  for all genotypes. We treat all genotypes as having the same  
 456  $k_{\text{fecundity}}$  (due to lack of evidence for genetic variation – see Experimental Results below). Our  
 457 experiment provides no information about values of  $k_{\text{dispersal}}$ , so we consider a range from 0.01 to 0.1,  
 458 equal across genotypes. Because we lack data on the number of seeds after dispersal, we do not calculate  
 459 a reproductive excess for this transition. This means that we calculate only two reproductive excesses for  
 460 each environmental condition, one for survival and one for fecundity, although the calculations are  
 461 different between low- and high-density conditions. These reproductive excesses are given by:

462 
$$\text{RE}(\text{fecundity, low density}) = k_{\text{fecundity}} N_{\text{adults}} - \frac{N_{\text{adults}}}{0.1 k_{\text{dispersal}} k'_{\text{seedling survival}}} \quad (1)$$

463 
$$\text{RE}(\text{survival, low density}) = k'_{\text{seedling survival}} N_{\text{seedlings}} - \frac{N_{\text{seedlings}}}{0.1 k_{\text{dispersal}} k_{\text{fecundity}}} \quad (2)$$

464 
$$\text{RE}(\text{fecundity, high density}) = k_{\text{fecundity}} N_{\text{adults}} - \frac{N_{\text{adults}}}{k_{\text{dispersal}} k'_{\text{survival}}} \quad (3)$$

465 
$$\text{RE}(\text{survival, high density}) = k'_{\text{survival}} N_{\text{seeds}} - \frac{N_{\text{seeds}}}{k_{\text{dispersal}} k_{\text{fecundity}}} \quad (4)$$

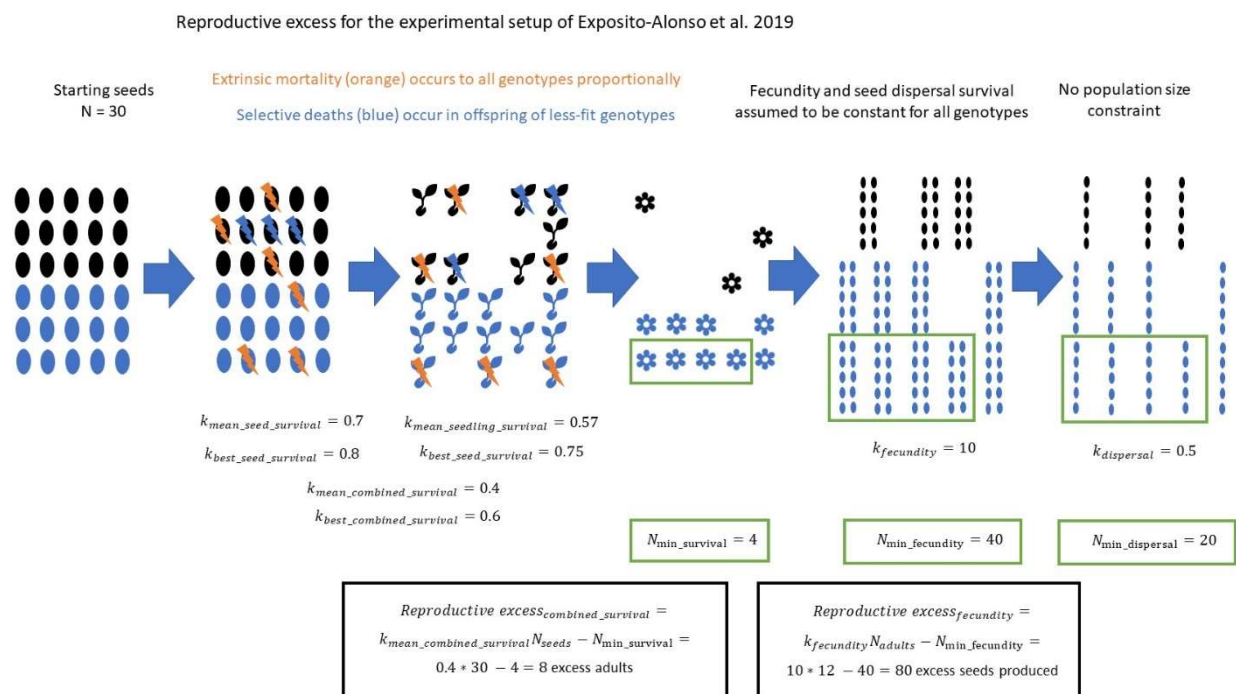

466

467 **Figure 3.** Worked example of reproductive excess for the life history transitions of *A. thaliana* in the  
 468 experimental setup from Exposito-Alonso *et al* (2019). We found no evidence for between-genotype  
 469 differences in fecundity and the experimental setup provides no information about seed dispersal, so we  
 470 show no selective deaths during these transitions. Specific values of  $k$  are chosen for illustrative purposes.

471

472 **Experimental**

473 Our empirical findings are restricted to selective deaths relating to juvenile survival. We did not analyze  
474 selective ‘deaths’ attributable to differences in fecundity, because an ANOVA on fecundity within and  
475 among genotypes showed no statistical support for any difference in mean fecundity among genotypes in  
476 six of the eight experimental conditions. Even in the two conditions with statistical significance, among-  
477 genotypic variance was three times smaller than among-replicate variance. A more sensitive  
478 MCMCglmm model with Poisson errors and controlling for replicate found non-zero heritability in 6/8  
479 environments, but still below 10%, which we consider low enough to neglect.

480 The proportion of *A. thaliana* deaths that are selective substantially exceeds Haldane’s 10% estimate in  
481 six out of eight experimental conditions, and is close to it in the other two (Figure 4 y-axis,  
482 Supplementary Table 2). In Madrid with low water and high density, as many as 95% of deaths are  
483 selective.

484 *A priori*, we expect high water and low density to be more benign, which might increase reproductive  
485 excess and/or reduce the proportion of deaths selective. While we cannot compare seed deaths at low  
486 density to seed plus seedling deaths at high density, these predictions are confirmed for high vs. low  
487 water: strongly in the case of selective deaths and excess seeds, and weakly with respect to excess  
488 seedlings (Figure 4, Supplementary Table 2). Estimated reproductive excess is fairly insensitive to the 10-  
489 fold range we consider for the proportion of seeds that successfully disperse to suitable habitats (vertical  
490 line length in Figure 4).

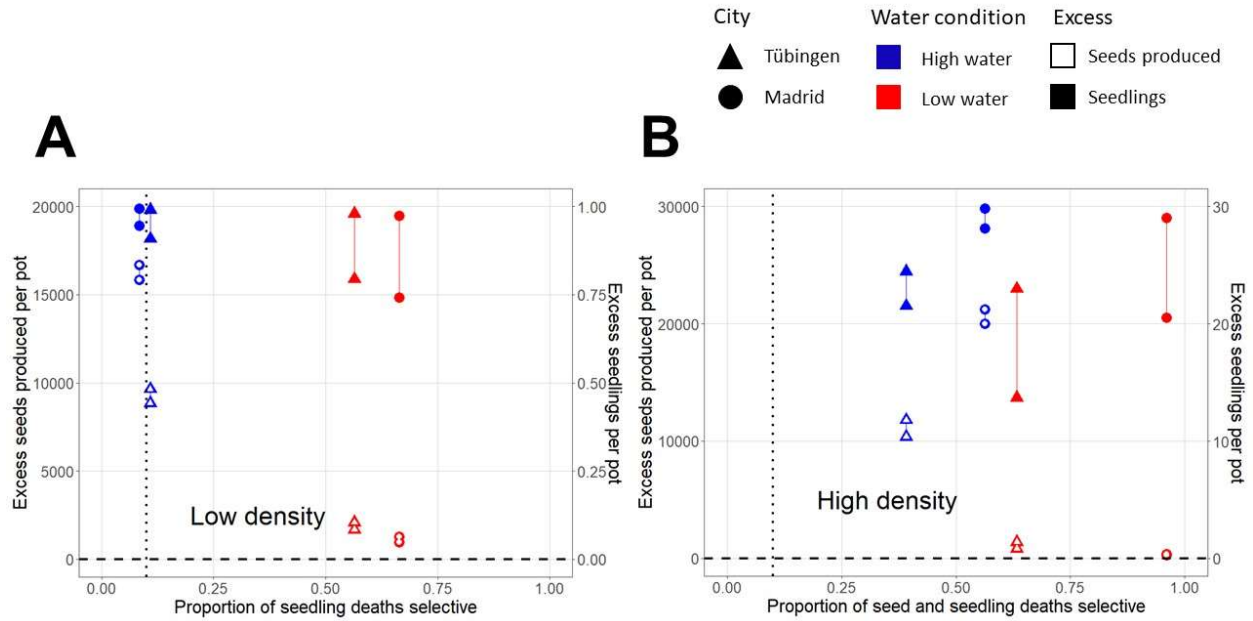

491

492 **Figure 4.** The proportion of deaths that are selective generally exceeds Haldane’s 10% estimate (dotted  
 493 vertical line), with ample reproductive excess (above zero, shown as dashed horizontal line) especially  
 494 under high-water conditions. Selective deaths shown on the x-axis apply either to seeds plus seedlings (A)  
 495 or to seedlings alone (B). Reproductive excess in seeds produced vs. seedlings surviving is shown with  
 496 open vs. closed symbols, corresponding to values shown on the left and right y-axes, respectively.  
 497 Reproductive excess is with respect to what the genotype with the highest survival produced above what  
 498 would be required to replace the starting population of a pot. Note that reproductive excess of seedlings  
 499 cannot exceed one per pot under low density conditions, and 30 per pot under high density conditions.  
 500 Reproductive excess of seeds produced was calculated using equation 1 for low-density conditions and  
 501 equation 3 for high-density conditions. Reproductive excess of surviving seedlings was calculated using  
 502 equations 2 and 4. All reproductive excesses are shown as a vertical range, with the lower bound  
 503 calculated using  $k_{dispersal} = 0.01$  and the upper bound calculated using  $k_{dispersal} = 0.1$ . The  
 504 proportions of deaths that are selective are adjusted for extreme value bias as shown in Supplementary  
 505 Table 1. Values can be found in Supplementary Table 2.

506



507 We expected *a priori* that harsher environmental conditions would have higher extrinsic mortality.  
508 However, this wasn't the case. We can estimate extrinsic mortality as the death rate of the best genotype,  
509 after correcting for extreme value bias (see columns 3 and 4 of Supplementary Table 1). Most  
510 environmental conditions saw a highest-fitness genotype with perfect survival, or close to it. We saw the  
511 most extrinsic mortality in the THP environmental condition, which is not one of the harsher conditions.  
512 Nei (1971) and Felsenstein (1971) implicitly assume high extrinsic mortality via their choice of value for  
513 reproductive excess; we explicitly account for extrinsic mortality during mortality transitions. Extrinsic  
514 mortality might of course be much higher in natural conditions, lowering the proportion of deaths below  
515 the high values observed here.

516 The artificially high genetic diversity in our experiment might inflate the proportion of deaths that are  
517 selective. If this were the case, then we expect that competition between more similar genotypes should  
518 lead to a smaller estimate for this proportion. We tested this prediction by repeating our analysis on every  
519 pair of genotypes, as though they were the only two genotypes in the experiment, and looking for a  
520 correlation between genetic distance and proportion of deaths selective. Note that we use genetic distance,  
521 much of it presumably neutral, as a proxy for genetic differences related to adaptation. Although some  
522 statistically significant correlations were observed in some environmental conditions, the direction of  
523 correlation was evenly split between negative and positive (as seen in Table 1), and the highest  $R^2$  value  
524 observed in any environmental condition was  $0.096^2 = 0.0092$ , for seedling deaths in the MLI  
525 environment, which we deem biologically insignificant. This is reassuring with respect to the artificially  
526 high genetic diversity in our experiment.

| Life history stage | Seedling deaths |         | Combined seed and seedling deaths |         |
|--------------------|-----------------|---------|-----------------------------------|---------|
|                    | Spearman's rho  | p-value | Spearman's rho                    | p-value |
| MLI                | 0.096           | 2.2e-16 |                                   |         |
| MHI                | 0.0004          | 0.88    |                                   |         |
| TLI                | -0.0024         | 0.39    |                                   |         |
| THI                | -0.0056         | 0.042   |                                   |         |
| MLP                |                 |         | 0.055                             | 2.2e-16 |
| MHP                |                 |         | 0.011                             | 4.9e-5  |
| TLP                |                 |         | -0.0081                           | 0.0031  |
| THP                |                 |         | -0.0085                           | 0.002   |

527

528 **Table 1:** Genetic distance between a pair of genotypes does not consistently correlate with proportion of  
 529 deaths selective. Visualization of each of the eight relationships is available in Supplementary Figures 4-  
 530 5.

531

## 532 DISCUSSION

533 The prevailing consensus is that Haldane's Dilemma poses no real limitation to the speed of adaptation,  
 534 despite persistent confusion as to the reason. Here we began by clarifying the primary issue with load-  
 535 based arguments: correcting Haldane's comparison to the best theoretically possible genotype, to instead  
 536 compare to the best genotype actually present, enables far more rapid adaptation. However, the historical  
 537 consensus that adaptation is not significantly limited largely overlooks a different and crucial type of  
 538 limitation pointed out by Nei (1971) and Felsenstein (1971), one that depends not on relative load but on  
 539 the finite nature of reproductive excess. If we accepted Haldane's previously unchallenged 10% guess as  
 540 an estimate for the reproductive excess that is available for selective deaths to take place among, or as an  
 541 estimate of the proportion of deaths that are selective, then the rate of adaptation would be significantly

542 limited. We clarified and extended theoretical arguments regarding selective deaths drawn from finite  
543 reproductive excess, along with a proof-of-concept application to an experimental dataset. Our extension  
544 applies flexibly to different life histories, including those for which a “generation” is poorly defined, e.g.  
545 colonial organisms.

546 Our experimental results suggest a possible resolution to Haldane’s concern that the rate of adaptation  
547 might be substantively limited. Our illustration of the model of Desai and Fisher (2007) confirms that the  
548 finite nature of reproductive excess would indeed limit the speed of adaptation if only 10% of deaths were  
549 available for selection. But the smallest proportion of selective deaths we observed across 8  
550 environmental conditions was 8.5%, while in the most adverse environmental conditions, 95% of deaths  
551 were selective. Relaxing this auxiliary assumption about a critical parameter value resolves Haldane’s  
552 concerns.

553 The data we use for our proof of concept measured selective deaths under artificial conditions. An  
554 obvious concern with our setup is that with genotypes representing Europe-wide diversity of *A. thaliana*,  
555 exaggerated differences between the best-adapted and worst-adapted genotypes would inflate estimates of  
556 the proportion of deaths that were selective. These concerns are partially mitigated by our unexpected  
557 finding that the genetic distance between genotypes is not consistently related to the proportion of deaths  
558 which would be selective in a competition between genotypes. However, two similar genotypes in our  
559 experiment represent more genetic distance than might be present within a typical natural population, and  
560 even closely related genotypes might differ in important fitness-associated traits. Future work under more  
561 natural conditions (e.g. with higher extrinsic mortality) and in different species (e.g. less fecund) remains  
562 necessary to reach the conclusion that the proportion of deaths that are selective is typically high. Our  
563 framework is flexible enough to be customized for any species, using whichever life history transitions  
564 best describe that species’ life history.

565 Empirical demonstration of the concepts, even with serious caveats about the generalizability of the  
566 empirical example, makes the concepts more concrete. This is especially important because disparate

567 usage of the term ‘substitutional load’ in the literature, as well as the variety of underlying lines of  
568 reasoning involved, has made this topic unnecessarily opaque. One aspect of our current work is simply to  
569 clarify the variety of lines of reasoning that produce limits on the rate of adaptation. Our more specific  
570 theoretical and empirical analyses then develop a line of reasoning about reproductive excess and  
571 selective deaths that was not previously resolved. The attention of creation science to this matter (Remine  
572 2005, 2006) highlights the importance of resolving it.

573 This approach, building on Haldane (1957), Nei (1971), and Felsenstein (1971), is not identical to  
574 standard modes of reasoning in genetics. In particular, quantitative genetics approaches follow Fisher  
575 (1930) to focus on variances — sums of differences squared — while selective deaths and reproductive  
576 excess are, like load, both differences, with no square operation. We hesitate to call this aspect of our  
577 approach ‘novel’, because it is clearly quite old, but it nevertheless comes across as novel with respect to  
578 aspects of contemporary evolutionary genetics.

579 Interestingly, the concept of relative load was later reinvented as the “lead”, as part of calculations that  
580 derived the actual speed of adaptation  $v$  (rather than limits to it) from the beneficial mutation rate  $U$ , the  
581 population size  $N$ , and the per-mutation selection coefficient  $s$  (Desai and Fisher 2007). One reason this  
582 solution was not available to Haldane was that population genetics had not yet begun to treat origination  
583 processes (McCandlish and Stoltzfus 2014). Instead of treating a steady input of beneficial new  
584 mutations, Haldane considered a scenario in which environmental change activates beneficial variants  
585 within standing genetic variation. Indeed, a variant’s initial frequency  $-\ln(p_0)$  is the primary factor in  
586 determining the maximum speed of adaptation. Some adaptation comes not from activation of standing  
587 genetic variation, but from *de novo* mutations each appearing at initial frequency  $1/N$  or  $1/2N$ . A lead-  
588 based approach was used for the latter to derive the rate of beneficial sweeps in asexuals as  $\frac{2s \ln[Ns]}{\ln^2[s/U]}$  for  
589 the simple case of constant  $s$  (Desai and Fisher 2007), for parameter ranges in which the previously  
590 derived rate  $UNs$  does not apply. Here we relaxed the assumption of infinite reproductive excess made by

591 this relative fitness model, and calculated the minimal reproductive excess required for the model to hold.  
592 We also reveal the model's implied fraction of deaths (or foregone fecundity) that are selective. Both  
593 quantities are functions of the lead.

594 Another approach, starting with Kimura (1961), is to use the framework of information theory to set  
595 bounds on the speed of adaptation. Natural selection increases the information stored in genomes (Adami  
596 2012). Kimura calculates the amount of information acquired per sweep in terms of  $p_0$  and then relates  
597 this to the cost of selection using Haldane's equation that  $D = -\ln(p_0)$  (Kimura 1961). More recent  
598 approaches treat the bounds placed on the accumulation of information in much more detail, while  
599 treating either the Malthusian parameter (McGee et al. 2022) or classic discrete time relative fitness  
600 (Hledík, Barton, and Tkačik 2022). Both these approaches define an information "cost", but this is not  
601 equal to our cost in terms of selective deaths.

602 The historical significance of Haldane's arguments about limitations to adaptation is that they were  
603 convincingly used to support neutral theory. This was framed as a dilemma because data on the rates of  
604 amino acid divergence among species seemed to exceed Haldane's speed limit. The development of  
605 neutral theory resolved this apparent dilemma by suggesting that most amino acid substitutions are  
606 neutral and do not count against the speed limit. However, the basis for this historical argument is now on  
607 troubled ground, because recent literature argues that the fraction of substitutions explained by adaptation  
608 can be high (Galtier 2016; Murga-Moreno et al. 2023; Sella et al. 2009; Uricchio, Petrov, and Enard  
609 2019), and that on shorter timescales, as much as 37% of allele frequency change is attributable to  
610 adaptation (Buffalo and Coop 2020). For example, recent experiments have shown rapid, pervasive  
611 seasonal adaptation in *Drosophila* (Bertram 2021; Kelly 2022; Machado et al. 2021). There are other  
612 possible resolutions — e.g. some estimates include substitutions of neutral alleles via hitchhiking.  
613 Nevertheless, it is curious that the empirical collapse of historical arguments for neutral theory has not led  
614 to a re-evaluation of related arguments by Haldane. Here we revise Haldane's arguments for the modern

615 era, finding that Haldane’s revised arguments are compatible with empirical evidence for abundant  
616 adaptation while still posing upper limits that might matter in some contexts.

617 We note, however, that Haldane (1957) used a one-locus model — linkage disequilibrium will typically  
618 make the conversion of selective deaths to adaptation less efficient than implied by the assumption of  
619 independence used both in his calculations, and in the subsequent calculations of Nei (1971) and  
620 Felsenstein (1971). Here we also considered the other extreme, in the form of the asexual model of Desai  
621 and Fisher (2007). The focus of the current work is to calculate the required reproductive excess and the  
622 proportion of deaths that are selective; more work is required to quantify how this is converted into  
623 adaptation in a broader range of models of linkage disequilibrium and epistasis, as well as life histories  
624 and antagonistic pleiotropy.

625 Excitingly, unlike most approaches in evolutionary genetics, the approach we describe does not require  
626 the quantity ‘fitness’, which is deceptively difficult to define in a manner that can be generalized to all  
627 circumstances (Ariew and Lewontin 2004; Bertram and Masel 2019; Doebeli, Ispolatov, and Simon 2017;  
628 Van Valen 1989). Standard quantitative definitions of either relative or absolute ‘fitness’ require a clear  
629 definition of a ‘generation’ over which change is assessed, which in turn requires a clear definition of an  
630 ‘individual’ whose life cycle a generation captures (Wilson and Barker 2021). While “lineage fitness”  
631 solves a number of problems (Akçay and Van Cleve 2016; Graves and Weinreich 2017; King and Masel  
632 2007), it does so at the cost of defining the fittest genotype to be that which tends to eventually prevail,  
633 sacrificing much of the quantitative benefit of ‘fitness’. Our generalized selective deaths approach is  
634 derived from selection, but does not require ‘fitness’ to be defined. Rather, we measure selective deaths  
635 from pairwise differences in fecundity and survival between each genotype and the best genotype present,  
636 during each life history transition. Reproductive excess corresponding to that life history transition  
637 indicates how stringent selection can be, without triggering a decline in population size. This approach  
638 applies at each life history transition and can therefore be generalized to species with complex life  
639 histories, where it becomes difficult to define a ‘generation’ and therefore fitness.

640 GLOSSARY

641 **Absolute fitness of an adult:** expected number of individual offspring surviving to adulthood (defined  
642 here for hermaphrodite species — half this value, if reproducing sexually with males).

643 **Absolute fitness of a juvenile:** expected number of individual offspring (or half this value, if reproducing  
644 sexually with males). Failure to survive to adulthood (reproductive maturity) implies zero offspring.

645 **Adult:** Reproductively mature individual. More than one adult life history stage may be defined.

646 **Cost of selection:** The number of selective deaths that must occur over time to accomplish defined  
647 evolutionary change, e.g. to complete a single selective sweep.

648 **Generation:** A set of life history transitions that ends the first time it returns, with new individuals, to the  
649 same life history stage (e.g. adult or juvenile) where it began.

650 **Individual:** An organism that meets a loosely-defined set of criteria (Wilson and Barker 2021), including  
651 a shared genome, and the degree of integration of parts. Whether e.g. a group of microbes is a closely  
652 connected ecological community vs. an individual organism may be a matter of biological judgment.

653 **Juvenile:** Individuals that are not yet reproductively mature. More than one juvenile life history stage  
654 may be defined, e.g. before vs. after dispersal.

655 **Lag load:** The difference in fitness between a theoretical best genotype that might not be present in the  
656 population and the average genotype present.

657 **Lead:** The difference in fitness between the best genotype present in the population and the average  
658 genotype present.

659 **Life history transition:** Survival (i.e. persistence of an individual), reproduction (i.e. generation of new  
660 individuals) and/or organismal growth from one life history stage to the next

661 **Load:** A difference in fitness between an actual genotype or population and a reference. See “lag load”  
662 and “lead” as concrete examples.

663 **Relative fitness:** expected relative genetic contribution to the next generation

664 **Reproductive excess:** The degree to which a hypothetical population concludes a life history transition  
665 with a larger population than the minimum required to complete a life history cycle without the  
666 population shrinking in size.

667 **Selective deaths:** The subset of deaths (or foregone fertility) that contributes to selective changes in allele  
668 frequency. This can be quantified as how many deaths each genotype experiences that would not have  
669 been experienced if that genotype were replaced by the best genotype.

670

671 DATA AVAILABILITY

672 All analysis was performed in R, and our code is available on GitHub:

673 [www.github.com/josephmatheson/selective\\_deaths](https://www.github.com/josephmatheson/selective_deaths).

674 ACKNOWLEDGEMENTS

675 This work was supported by the John Templeton Foundation [62028] and [62220]. We thank Taylor

676 Kessinger for sparking the last author’s original interest in this topic many years ago by presenting

677 Haldane’s 1957 paper in journal club, and Jason Bertram and Ryan Gutenkunst for helpful discussions.

678 AUTHOR CONTRIBUTIONS

679 Conception of the paper by Joanna Masel and Moises Exposito-Alonso. Design and interpretation by

680 Joseph Matheson and Joanna Masel. Data and details of experimental methodology provided by Moises

681 Exposito-Alonso. Data analysis mostly by Joseph Matheson, with the MCMCglmm model analyzed by



682 Moises Exposito-Alonso. Manuscript drafted by Joseph Matheson and substantively revised by all  
683 authors.

#### 684 CONFLICT OF INTEREST

685 The authors declare no conflicting interests.

#### 686 BIBLIOGRAPHY

- 687 Adami, Christoph. 2012. “The Use of Information Theory in Evolutionary Biology.” *Annals of the New*  
688 *York Academy of Sciences* 1256(1):49–65. doi: 10.1111/j.1749-6632.2011.06422.x.
- 689 Akçay, Erol, and Jeremy Van Cleve. 2016. “There Is No Fitness but Fitness, and the Lineage Is Its  
690 Bearer.” *Philosophical Transactions of the Royal Society B: Biological Sciences* 371(1687). doi:  
691 10.1098/rstb.2015.0085.
- 692 Ariew, André, and R. C. Lewontin. 2004. “The Confusions of Fitness.” *British Journal for the Philosophy*  
693 *of Science* 55(2):347–63. doi: 10.1093/bjps/55.2.347.
- 694 Bell, Graham. 2017. “Evolutionary Rescue.” *Annual Review of Ecology, Evolution, and Systematics*  
695 48:605–27. doi: 10.1146/annurev-ecolsys-110316-023011.
- 696 Bertram, J., K. Gomez, and J. Masel. 2017. “Predicting Patterns of Long-Term Adaptation and Extinction  
697 with Population Genetics.” *Evolution*. doi: 10.1111/evo.13116.
- 698 Bertram, Jason. 2021. “Allele Frequency Divergence Reveals Ubiquitous Influence of Positive Selection  
699 in *Drosophila*.” *PLOS Genetics* 17(9):e1009833. doi: 10.1371/journal.pgen.1009833.
- 700 Bertram, Jason, and Joanna Masel. 2019. “Density-Dependent Selection and the Limits of Relative  
701 Fitness.” *Theoretical Population Biology* 129:81–92. doi: 10.1016/j.tpb.2018.11.006.
- 702 Buffalo, Vince, and Graham Coop. 2020. “Estimating the Genome-Wide Contribution of Selection to  
703 Temporal Allele Frequency Change.” *Proceedings of the National Academy of Sciences of the*  
704 *United States of America* 117(34):20672–80. doi: 10.1073/pnas.1919039117.
- 705 Bull, JJ, R. Sanjuán, and CO Wilke. 2007. “Theory of Lethal Mutagenesis for Viruses.” *Journal of*  
706 *Virology* 81(6):2930–39. doi: 10.1128/jvi.01624-06.
- 707 Crow, James F. 1958. “Some Possibilities for Measuring Selection Intensities in Man.” *Human Biology*  
708 30(1):1–13.
- 709 Desai, Michael M., and Daniel S. Fisher. 2007. “Beneficial Mutation-Selection Balance and the Effect of  
710 Linkage on Positive Selection.” *Genetics* 176(3):1759–98. doi: 10.1534/genetics.106.067678.
- 711 Doebeli, Michael, Yaroslav Ispolatov, and Burt Simon. 2017. “Towards a Mechanistic Foundation of  
712 Evolutionary Theory.” *ELife* 6:1–17. doi: 10.7554/elife.23804.
- 713 Ewens, Warren. 1970. “Remarks on the Substitutional Load.” *Theoretical Population Biology* 139:129–  
714 39.

- 715 Ewens, Warren. 2004. *Mathematical Population Genetics*. 2nd ed. New York: Springer US.
- 716 Exposito-alonso, Moises, Oliver Bossdorf, Rasmus Nielsen, and Detlef Weigel. 2019. “Natural Selection  
717 on the Arabidopsis Thaliana Genome in Present and Future Climates.” *Nature* 573(7772):126–29.  
718 doi: 10.1038/s41586-019-1520-9.
- 719 Felsenstein, Joseph. 1971. “On the Biological Significance of the Cost of Gene Substitution.” *American*  
720 *Naturalist* 105(941):1–11.
- 721 Fisher, Ronald. 1930. *The Genetical Theory of Natural Selection*. Oxford: Clarendon Press.
- 722 Galeota-Sprung, Benjamin, Paul Sniegowski, and Warren Ewens. 2020. “Mutational Load and the  
723 Functional Fraction of the Human Genome.” *Genome Biology and Evolution* 12(4):273–81. doi:  
724 10.1093/gbe/evaa040.
- 725 Galtier, Nicolas. 2016. “Adaptive Protein Evolution in Animals and the Effective Population Size  
726 Hypothesis.” *PLoS Genetics* 12(1):1–23. doi: 10.1371/journal.pgen.1005774.
- 727 Graves, Christopher J., and Daniel M. Weinreich. 2017. “Variability in Fitness Effects Can Preclude  
728 Selection of the Fittest.” *Annual Review of Ecology, Evolution, and Systematics* 48:399–417. doi:  
729 <https://doi.org/10.1146/annurev-ecolsys-110316-022722>.
- 730 Haldane, JBS. 1957. “The Cost of Natural Selection.” *Genetics* 55(3):511–24.
- 731 Hledik, Michal, Nick Barton, and Gašper Tkačik. 2022. “Accumulation and Maintenance of Information  
732 in Evolution.” *Proceedings of the National Academy of Sciences of the United States of America*  
733 119(36):1–10. doi: 10.1073/pnas.2123152119.
- 734 Kelly, John. 2022. “The Genomic Scale of Fluctuating Selection in a Natural Plant Population.” *Evolution*  
735 *Letters* 506–21. doi: 10.1002/evl3.308.
- 736 Kern, Andrew D., and Matthew W. Hahn. 2018. “The Neutral Theory in Light of Natural Selection.”  
737 *Molecular Biology and Evolution* 35(6):1366–71. doi: 10.1093/molbev/msy092.
- 738 Kimura, Motoo. 1960. “Optimum Mutation Rate and Degree of Dominance as Determined by the  
739 Principle of Minimum Genetic Load.” *Genetics* 57(1):21–34.
- 740 Kimura, Motoo. 1961. “Natural Selection as the Process of Accumulating Genetic Information in  
741 Adaptive Evolution.” *Genetical Research* 2(1):127–40. doi: 10.1017/S0016672300000616.
- 742 Kimura, Motoo. 1968. “Evolutionary Rate at the Molecular Level.” *Nature* 217:624–26.
- 743 Kimura, Motoo. 1969. “The Number of Heterozygous Nucleotide Sites Maintained in a Finite Population  
744 Due to Steady Flux of Mutations.” *Genetics* 61(4):893–903.
- 745 Kimura, Motoo, and James F. Crow. 1969. “Natural Selection and Gene Substitution.” *Genetical*  
746 *Research* 13(2):127–41. doi: 10.1017/S0016672300002846.
- 747 Kimura, Motoo, and Tomoko Ohta. 1971. “On the Rate of Molecular Evolution.” *Journal of Molecular*  
748 *Evolution* 1(1):1–17. doi: 10.1007/BF01659390.
- 749 King, Oliver D., and Joanna Masel. 2007. “The Evolution of Bet-Hedging Adaptations to Rare  
750 Scenarios.” *Theoretical Population Biology* 72(4):560–75. doi: 10.1016/j.tpb.2007.08.006.

- 751 Lehmann, Laurent, Charles Mullon, Erol Akçay, and Jeremy Van Cleve. 2016. “Invasion Fitness,  
752 Inclusive Fitness, and Reproductive Numbers in Heterogeneous Populations.” *Evolution;*  
753 *International Journal of Organic Evolution* 70(8):1689–1702. doi: 10.1111/evo.12980.
- 754 Machado, Heather E., Alan O. Bergland, Ryan Taylor, Susanne Tilk, Emily Behrman, Kelly Dyer, Daniel  
755 K. Fabian, Thomas Flatt, Josefa González, Talia L. Karasov, Bernard Kim, Iryna Kozeretska, Brian  
756 P. Lazzaro, Thomas J. S. Merritt, John E. Pool, Katherine O’Brien, Subhash Rajpurohit, Paula R.  
757 Roy, Stephen W. Schaeffer, Svitlana Serga, Paul Schmidt, and Dmitri A. Petrov. 2021. “Broad  
758 Geographic Sampling Reveals the Shared Basis and Environmental Correlates of Seasonal  
759 Adaptation in *Drosophila*.” *ELife* 10. doi: 10.7554/eLife.67577.
- 760 Maynard Smith, J. 1968. “‘Haldane’s Dilemma’ and the Rate of Evolution.” *Nature* 219(5159):1114–16.  
761 doi: 10.1038/2191114a0.
- 762 Maynard Smith, J. 1976. “What Determines the Rate of Evolution?” *American Naturalist* 110(973):331–  
763 38.
- 764 McCandlish, David M., and Arlin Stoltzfus. 2014. “Modeling Evolution Using the Probability of  
765 Fixation: History and Implications.” *Quarterly Review of Biology* 89(3):225–52. doi:  
766 10.1086/677571.
- 767 McGee, Ryan Seamus, Olivia Kosterlitz, Artem Kaznatcheev, Benjamin Kerr, and Carl T. Bergstrom.  
768 2022. “The Cost of Information Acquisition by Natural Selection.” *Biorxiv* 2022.07.02. doi:  
769 10.1101/2022.07.02.498577.
- 770 Metz, J. A. J., S. A. H. Geritz, and R. M. Nisbet. 1992. “How Should We Define ‘Fitness’ for General  
771 Ecological Scenarios? The Simplest Textbook Model for Selection in Large Populations Relies  $N(t)$   
772  $= B(E(t)) N(t) (1)$  with  $B(E(t))$  a Matrix Whose Elements Depend on  $E(t)$ , Implying  $N(t) =$   
773  $B(E(I-I)) B(E(t-2))$ . ..” *Trends in Ecology & Evolution* 7(6):198–202.
- 774 Murga-Moreno, Jesús, Sònia Casillas, Antonio Barbadilla, Lawrence Uricchio, and David Enard. 2023.  
775 “An Efficient and Robust ABC Approach to Infer the Rate and 1 Strength of Adaptation.” *Biorxiv*.  
776 doi: 10.1101/2023.08.29.555322.
- 777 Nei, Masatoshi. 1971. “Fertility Excess Necessary for Gene Substitution in Regulated Populations.”  
778 *Genetics* 68:169–84.
- 779 Remine, Walter. 2006. “More Precise Calculations of the Cost of Substitution.” *Creation Research*  
780 *Science Quarterly* 43(September).
- 781 Remine, Walter J. 2005. “Cost Theory and the Cost of Substitution — a Clarification.” *Journal of*  
782 *Creation* 19(1):113–25.
- 783 Roff, Derek A. 2008. “Defining Fitness in Evolutionary Models.” *Journal of Genetics* 87(4):339–48. doi:  
784 10.1007/s12041-008-0056-9.
- 785 Rudman, Seth M., Sharon I. Greenblum, Subhash Rajpurohit, Nicolas J. Betancourt, Jinjoo Hanna,  
786 Susanne Tilk, Tuya Yokoyama, Dmitri A. Petrov, and Paul Schmidt. 2022. “Direct Observation of  
787 Adapting Tracking on Ecological Time Scales in *Drosophila*.” *Science* 375(6586). doi:  
788 10.1126/science.abj7484.

- 789 Sella, Guy, Dmitri A. Petrov, Molly Przeworski, and Peter Andolfatto. 2009. “Pervasive Natural  
790 Selection in the *Drosophila* Genome?” *PLoS Genetics* 5(6):e1000495. doi:  
791 10.1371/journal.pgen.1000495.
- 792 Uricchio, Lawrence H., Dmitri A. Petrov, and David Enard. 2019. “Exploiting Selection at Linked Sites  
793 to Infer the Rate and Strength of Adaptation.” *Nature Ecology & Evolution* 3(6):977–84. doi:  
794 10.1038/s41559-019-0890-6.
- 795 Van Valen, Leigh. 1963. “Haldane’s Dilemma, Evolutionary Rates, and Heterosis.” *American Naturalist*  
796 97(894):185–90.
- 797 Van Valen, Leigh. 1989. “Three Paradigms of Evolution.” *Evolutionary Theory* 9(2):1–17.
- 798 Wilson, Robert A., and Matthew J. Barker. 2021. “Biological Individuals” edited by E. N. Zalta. *Stanford*  
799 *Encyclopedia of Philosophy* 2021.
- 800
- 801

## SUPPLEMENTARY INFORMATION

### Contents

|                                         |   |
|-----------------------------------------|---|
| Supplementary Methods .....             | 1 |
| Correction for extreme value bias ..... | 1 |
| Supplementary Tables .....              | 2 |
| Supplementary Table 1 .....             | 2 |
| Supplementary Table 2 .....             | 3 |
| Supplementary Figures .....             | 4 |
| Supplementary Figure 1 .....            | 4 |
| Supplementary Figure 2 .....            | 5 |
| Supplementary Figure 3 .....            | 6 |
| Supplementary Figure 4 .....            | 7 |
| Supplementary Figure 5 .....            | 8 |

### Supplementary Methods

#### Correction for extreme value bias

The estimated best genotype is subject to extreme value bias, leading to overestimation of the number of selective deaths. I.e., the best genotype observed is likely not only to be a superior genotype, but also to have outperformed its own expected death rate by chance. The more uncertainty in estimated genotypic survival rates, relative to true genetic variance, the worse the extreme value bias problem. Here we attempt a rough estimate of the magnitude of extreme value bias using the observed noise among replicates and among genotypes. We then subtract a conservative estimate of bias from our best observed genotype, and redo our calculations of selective deaths.

We perform 10,000 simulations per environmental treatment. In each simulation, we assume that the observed 517 genotypic death rates are the ‘true’ values for each genotype (thus slightly overestimating genetic variance within the population). We then resample the number of surviving seeds ‘observed’ for each replicate of that genotype using a binomial distribution and calculate the resulting observed death rate.

In each simulated dataset, we took the best observed genotype and recorded the difference between its observed value and its actual genotypic value, then averaged these differences across the 10,000 simulations to obtain estimated bias. We then adjusted our estimate of the number of selective deaths to incorporate this estimated bias:

$$\text{Total adjusted selective deaths} = \sum_{i=1}^{517} n_i (d_i - (d_{best} + bias)).$$

Adjustments to selective deaths are shown in Supplementary Table 1. Across all environmental treatments, adjusting for extreme value bias leads to negligible change in the estimate of the proportion of deaths which are selective.

## Supplementary Tables

| Environmental condition | Among-genotype variance | Observed maximum survival rate | Estimated bias | Unadjusted proportion of deaths selective | Adjusted proportion of deaths selective |
|-------------------------|-------------------------|--------------------------------|----------------|-------------------------------------------|-----------------------------------------|
| MLI                     | 0.0618                  | 1                              | 0              | 0.664                                     | 0.664                                   |
| MHI                     | 0.0144                  | 1                              | 0              | 0.0847                                    | 0.0847                                  |
| TLI                     | 0.0337                  | 1                              | 0              | 0.564                                     | 0.564                                   |
| THI                     | 0.0139                  | 1                              | 0              | 0.109                                     | 0.109                                   |
| MLP                     | 0.0113                  | 1                              | 0              | 0.96                                      | 0.96                                    |
| MHP                     | 0.0433                  | 1                              | 0              | 0.564                                     | 0.564                                   |
| TLP                     | 0.023                   | 0.947                          | 0.00418        | 0.633                                     | 0.629                                   |
| THP                     | 0.0195                  | 0.871                          | 0.0195         | 0.391                                     | 0.372                                   |

**Supplementary Table 1:** Adjusting for extreme value bias has little effect on the estimated proportion of selective deaths.

In six out of eight environmental conditions, at least one genotype had all plants survive until the end of the experiment. This genotype then has an observed death rate of zero and an observed between-replicate variance of zero, and thus our approach will not find any bias. Determining bias in this case would require attempting to fit and then resample from a true distribution of genotypic values that includes death rates near but not equal to zero. We did not pursue this avenue, because resampling genotypes would add a new source of variance, and we need only correct for the extreme value bias pertaining to the genotypes actually studied. Given the small degree of bias observed in the two environmental conditions in which no genotype experienced perfect survival, we consider our approach sufficient to conclude that extreme value bias has little quantitative effect on our results.

|            | <b>Proportion of seedling deaths selective</b> | <b>Proportion of combined seed and seedling deaths selective</b> | <b>Excess seedlings per pot after seedling survival transition</b> | <b>Excess seedlings per pot after seed and seedling survival transition</b> | <b>Excess seeds produced per pot after fecundity transition</b> |
|------------|------------------------------------------------|------------------------------------------------------------------|--------------------------------------------------------------------|-----------------------------------------------------------------------------|-----------------------------------------------------------------|
| <b>MLI</b> | 0.664                                          |                                                                  | 0.742-0.974                                                        |                                                                             | 967-1,269                                                       |
| <b>MHI</b> | 0.0847                                         |                                                                  | 0.945-0.995                                                        |                                                                             | 15,856-16,680                                                   |
| <b>TLI</b> | 0.564                                          |                                                                  | 0.794-0.979                                                        |                                                                             | 1,683-2,075                                                     |
| <b>THI</b> | 0.109                                          |                                                                  | 0.908-0.991                                                        |                                                                             | 8,848-9,651                                                     |
| <b>MLP</b> |                                                | 0.960                                                            |                                                                    | 20.51-29.05                                                                 | 257-364                                                         |
| <b>MHP</b> |                                                | 0.564                                                            |                                                                    | 28.16-29.82                                                                 | 20,029-21,207                                                   |
| <b>TLP</b> |                                                | 0.633                                                            |                                                                    | 13.71-22.97                                                                 | 833-1,396                                                       |
| <b>THP</b> |                                                | 0.391                                                            |                                                                    | 21.52-24.47                                                                 | 10,374-11,796                                                   |

**Supplementary Table 2.** Proportion of deaths that are selective are above Haldane's 10% estimate for most environmental conditions. Reproductive excess after the survival and fecundity life history transitions are high. Note that reproductive excess per pot for low-density conditions cannot exceed one, and excess per pot for high-density conditions cannot exceed 30. For reproductive excess, lower bounds are calculated using  $k_{dispersal} = 0.01$  and higher bounds are calculated using  $k_{dispersal} = 0.1$ . Reproductive excess values for fecundity are rounded to the nearest integer; approximate methods were used to estimate seed number.

## Supplementary Figures

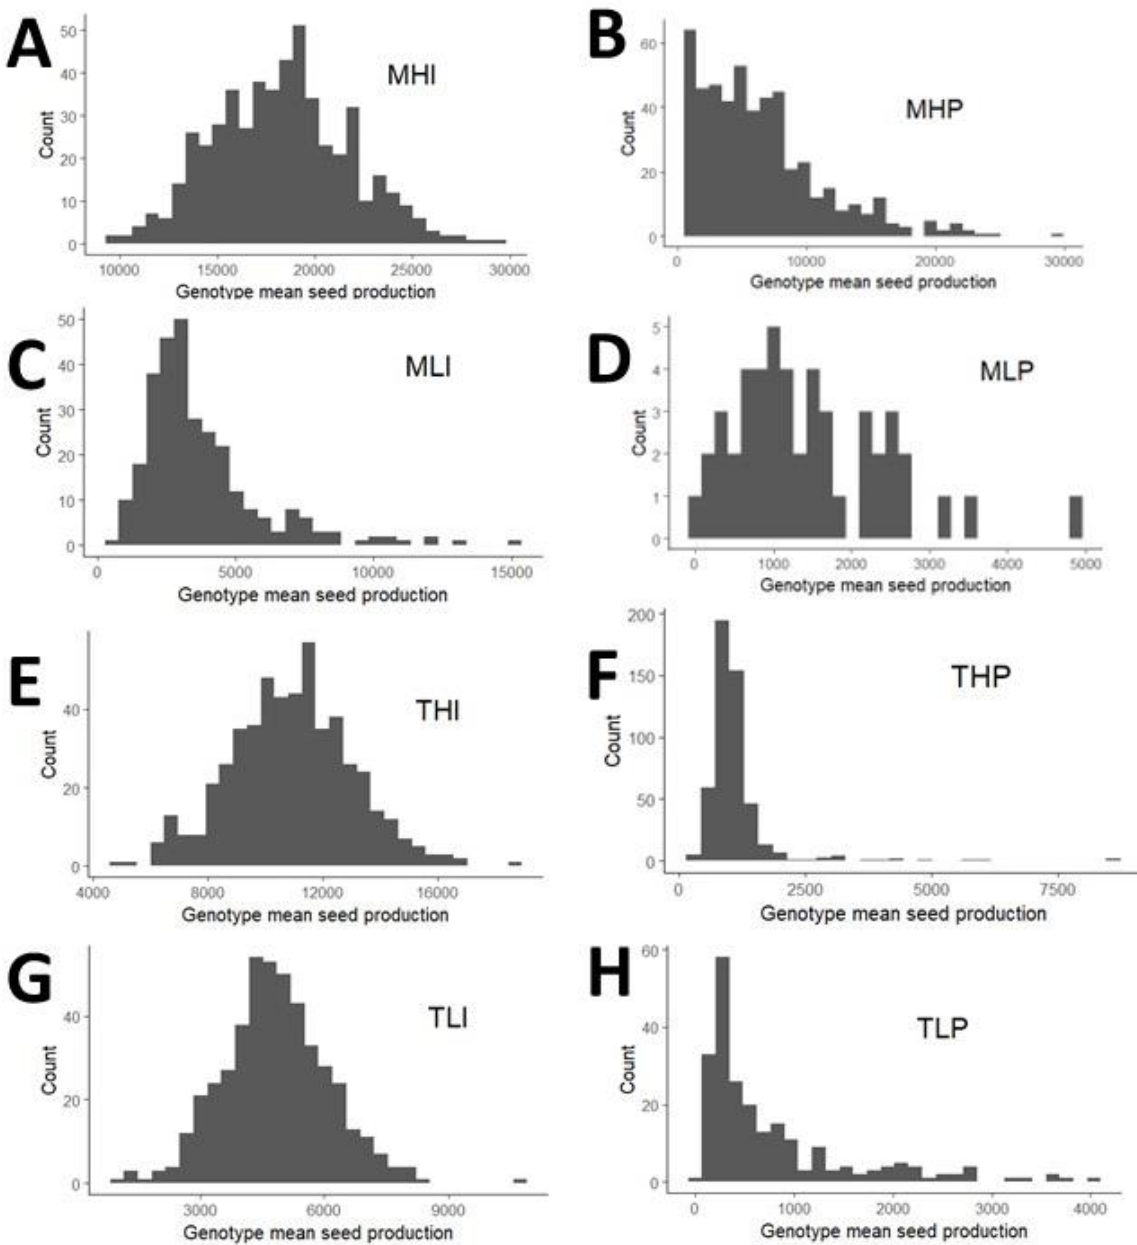

Supplementary Figure 1. Histograms of genotype mean seed production for every genotype with at least one surviving adult in each of the eight environmental conditions.



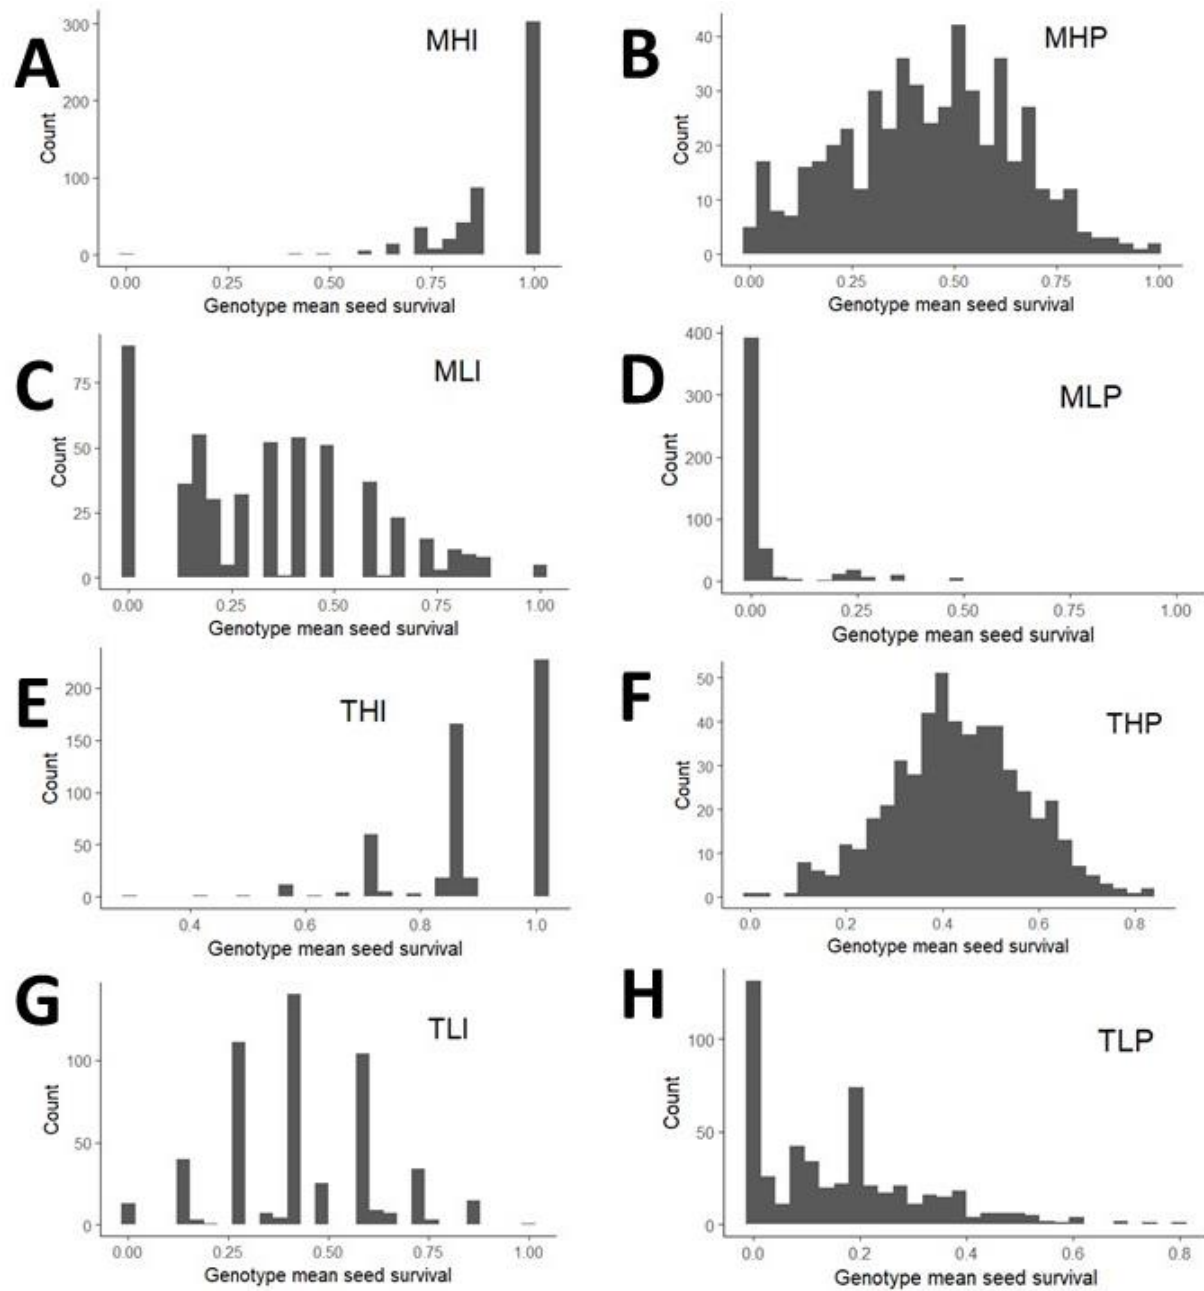

Supplementary Figure 2. Histograms of genotype mean seed survival for every genotype in each of the eight environmental conditions.

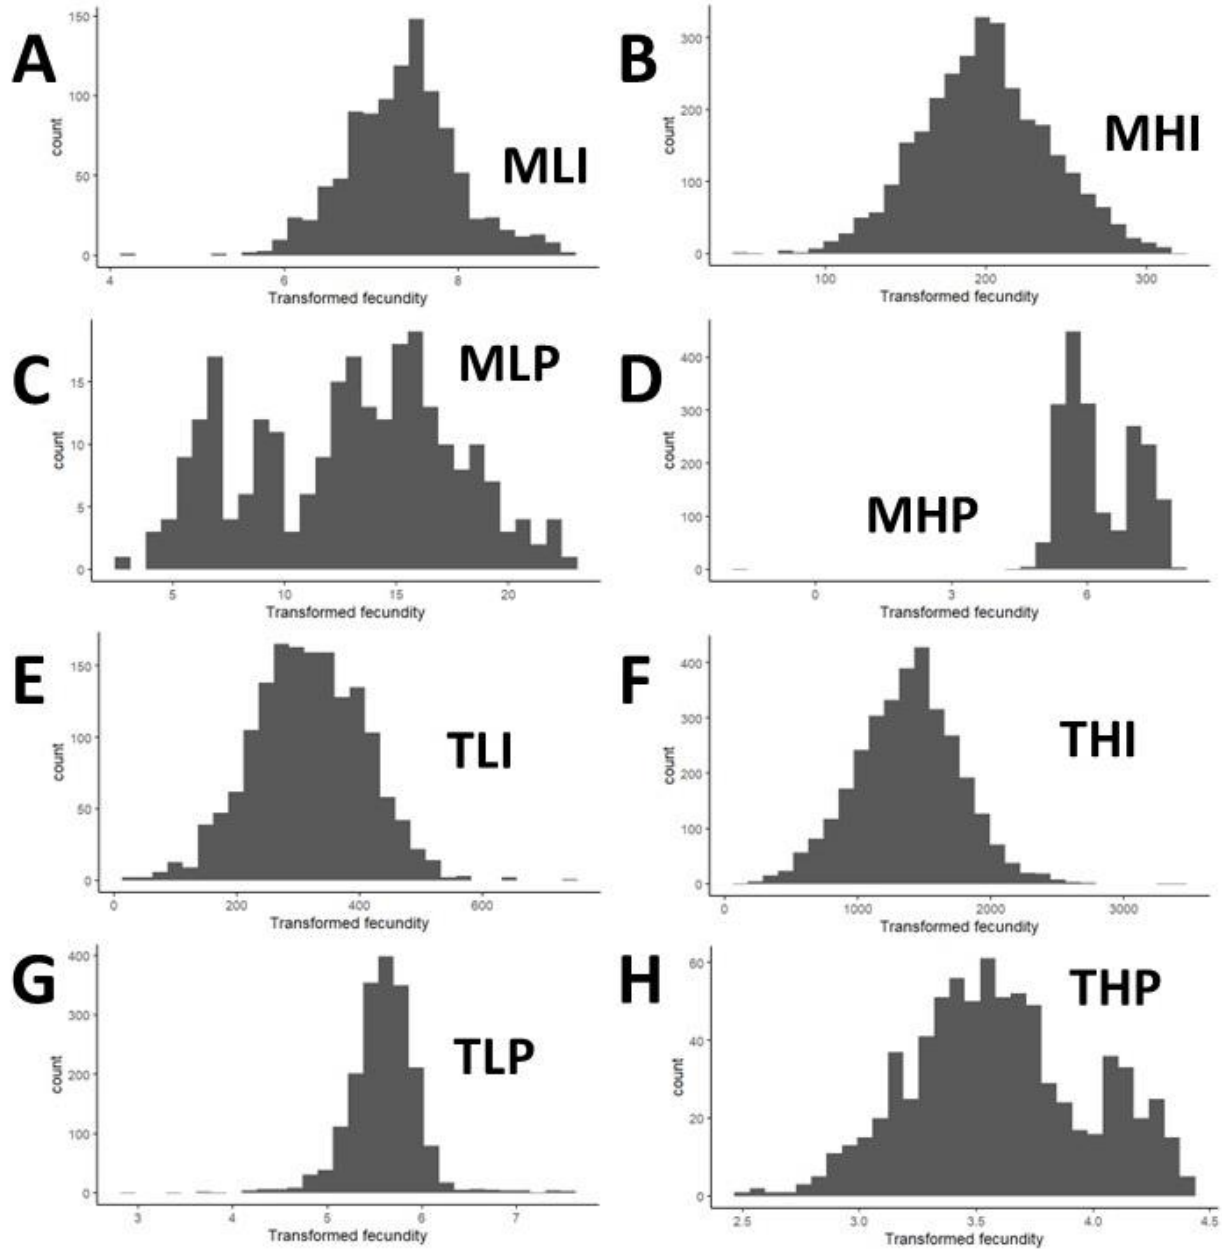

Supplementary Figure 3. Histograms of Box-Cox transformed fecundity values for every pot with surviving adults in each of the eight environmental conditions. Lambda values for the Box-Cox transformations are (A) -0.02, (B) 0.46, (C) 0.18, (D) -0.06, (E) 0.63, (F) 0.75, (G) -0.18, (H) -0.06

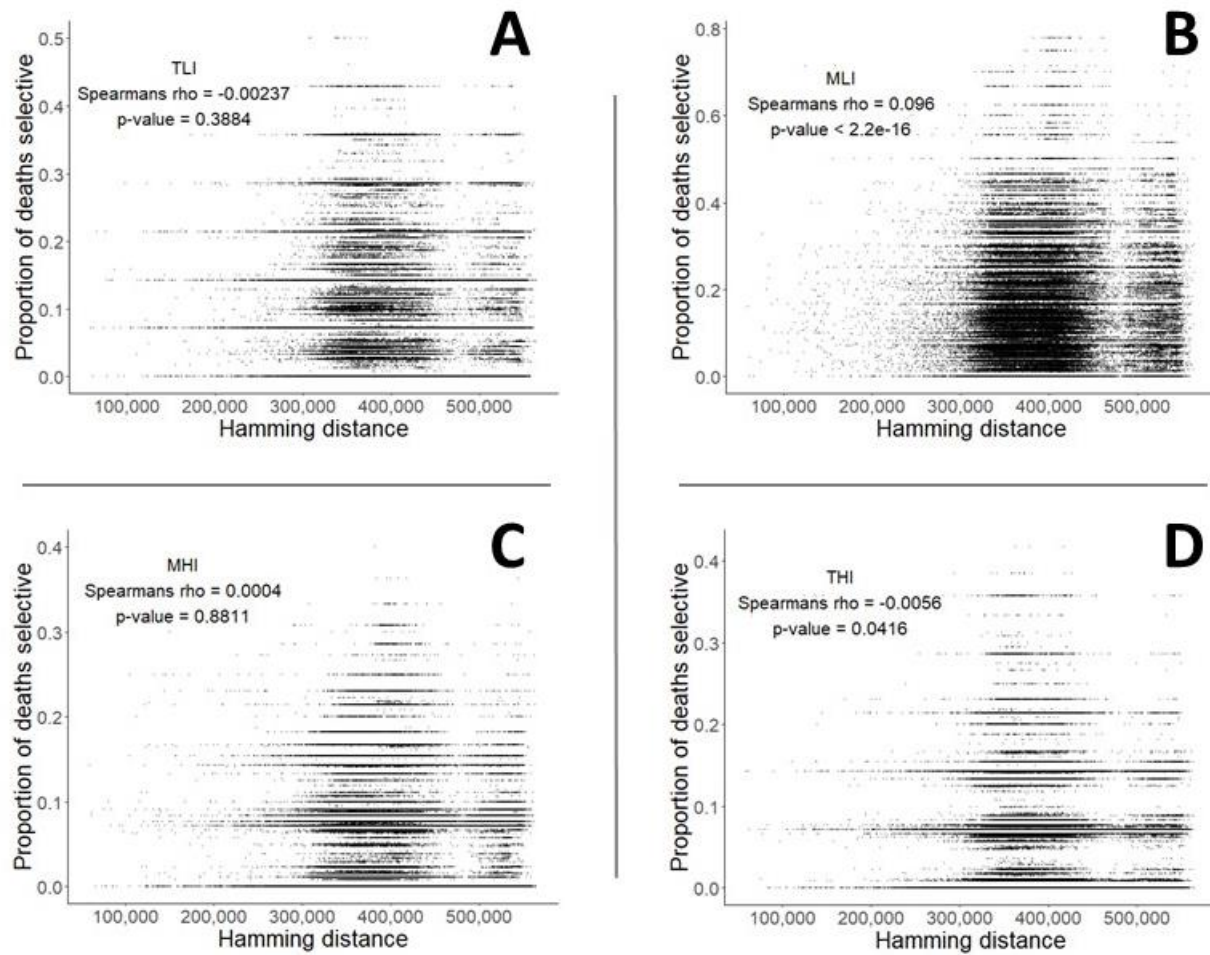

Supplementary Figure 4. Hamming distance does not substantially predict the proportion of deaths selective during the life history stage of combined seed and seedling survival at low density.

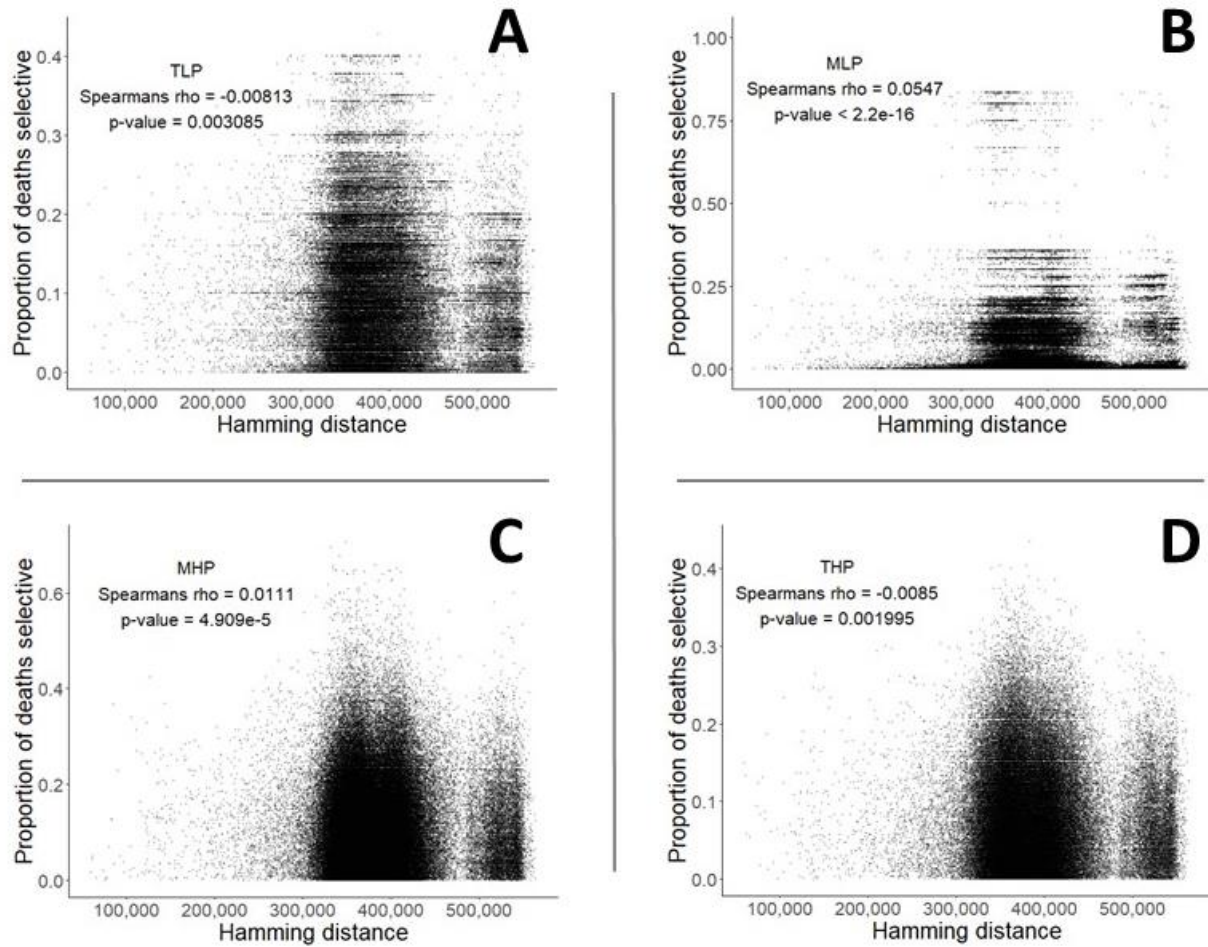

Supplementary Figure 5. Hamming distance does not substantially predict the proportion of deaths selective during the life history stage of seedling survival at high density.
